# Supplementary material
Source: PubMed Central journal article supplement (PMC6321795)
Supplement: kwy143_chevrier_web_material_final.pdf [file kwy143_chevrier_web_material_final.pdf]

## WEB MATERIAL

**Associations of Maternal Exposure to Dichlorodiphenyltrichloroethane and Pyrethroids With Birth Outcomes Among Participants in the Venda Health Examination of Mothers, Babies and Their Environment Study Residing in an Area Sprayed for Malaria Control**

Jonathan Chevrier, Stephen Rauch, Madelein Crause, Muvhulawa Obida, Fraser Gaspar, Riana Bornman, and Brenda Eskenazi

Contents: Web Tables 1–20

**Web Table 1.** Covariates included in the Super Learner algorithm to estimate propensity scores and stabilized weights

| Covariates                                  | Form                                                 |
|---------------------------------------------|------------------------------------------------------|
| Maternal variables                          |                                                      |
| Age                                         | Continuous (years)                                   |
| Education                                   | Categorical (<Grade 12, Grade 12, >Grade 12)         |
| Marital status                              | Categorical (Married/living as married, Not married) |
| Post-delivery weight                        | Continuous (kg)                                      |
| Post-delivery body mass index               | Continuous (kg/m <sup>2</sup> )                      |
| Parity                                      | Continuous (n)                                       |
| Daily energy intake                         | Continuous (kJ)                                      |
| Daily fat intake                            | Continuous (g)                                       |
| Fruit consumption (eaten with skin)         | Continuous (frequency/month)                         |
| Vegetable consumption (not growing in soil) | Continuous (frequency/month)                         |
| Food security                               | Categorical (High, Low, Very low)                    |
| HIV status                                  | Categorical (Positive, Negative)                     |
| Smoking                                     | Categorical (Yes, No)                                |
| Exposure to environmental tobacco smoke     | Categorical (Any, None)                              |
| Total PCB serum concentrations              | Continuous (ng/g lipid)                              |
| Alcohol consumption                         | Categorical (Any, None)                              |
| Stress                                      | Continuous (Score)                                   |
| Household variables                         |                                                      |
| Income                                      | Continuous (Rands per capita)                        |
| Assets                                      | Continuous (First principal component)               |
| Child variables                             |                                                      |
| Sex                                         | Categorical (Female/Male)                            |
| Season of birth                             | Categorical (Rainy/Harvest/Gardening)                |
| Mode of delivery                            | Categorical (vaginal/caesarean section)              |

**Web Table 2.** Correlations between maternal peripartum serum DDT/E (ng/g lipids) and urinary pyrethroid metabolites ( $\mu\text{g/L}$ , specific gravity-adjusted) concentrations among VHEMBE study participants

|                    | <i>p,p'</i> -DDT          | <i>p,p'</i> -DDE          | <i>o,p'</i> -DDT          | <i>cis</i> -DBCA          | <i>cis</i> -DCCA          | <i>trans</i> -DCCA        |
|--------------------|---------------------------|---------------------------|---------------------------|---------------------------|---------------------------|---------------------------|
| <i>p,p'</i> -DDT   |                           |                           |                           |                           |                           |                           |
| <i>p,p'</i> -DDE   | 0.85 <sup>a</sup> (n=751) |                           |                           |                           |                           |                           |
| <i>o,p'</i> -DDT   | 0.78 <sup>a</sup> (n=751) | 0.69 <sup>a</sup> (n=751) |                           |                           |                           |                           |
| <i>cis</i> -DBCA   | 0.01 (n=738)              | -0.03 (n=738)             | 0.08 <sup>a</sup> (n=738) |                           |                           |                           |
| <i>cis</i> -DCCA   | 0.03 (n=738)              | 0.02 (n=738)              | 0.04 (n=738)              | 0.46 <sup>a</sup> (n=738) |                           |                           |
| <i>trans</i> -DCCA | 0.01 (n=738)              | 0.00 (n=738)              | 0.02 (n=738)              | 0.47 <sup>a</sup> (n=738) | 0.90 <sup>a</sup> (n=738) |                           |
| 3PBA               | 0.03 (n=737)              | 0.01 (n=737)              | 0.05 (n=737)              | 0.62 <sup>a</sup> (n=737) | 0.88 <sup>a</sup> (n=737) | 0.87 <sup>a</sup> (n=737) |

<sup>a</sup>  $P < 0.05$ .

**Web Table 3.** Association between maternal peripartum serum DDT/E concentrations and birth outcomes in VHEMBE study participants based on standard multivariable regression models<sup>a</sup>

|                                        |                         | N   | <i>p,p'</i> -DDT<br>β/OR (95% CI) | <i>p,p'</i> -DDE<br>β/OR (95% CI) | <i>o,p'</i> -DDT<br>β/OR (95% CI) |
|----------------------------------------|-------------------------|-----|-----------------------------------|-----------------------------------|-----------------------------------|
| Birth weight (g) <sup>b</sup>          | All                     | 750 | 18.8 (−19.4, 56.9)                | 24.2 (−21.2, 69.6)                | 19.3 (−27.7, 66.3)                |
|                                        | Boys                    | 387 | −14.3 (−66.6, 38.1)               | −11.2 (−74.6, 52.2)               | −27.6 (−92.6, 37.3)               |
|                                        | Girls                   | 363 | 54.9 (0.2, 109.6) <sup>d</sup>    | 60.9 (−3.5, 125.4)                | 69.5 (2.4, 136.6) <sup>d</sup>    |
|                                        | <i>p</i> <sub>int</sub> |     | 0.071                             | 0.116                             | 0.041                             |
| Length (cm) <sup>b</sup>               | All                     | 745 | 0.19 (0.00, 0.39) <sup>d</sup>    | 0.24 (0.02, 0.47) <sup>d</sup>    | 0.23 (0.00, 0.47)                 |
|                                        | Boys                    | 383 | 0.08 (−0.19, 0.34)                | 0.10 (−0.22, 0.41)                | 0.04 (−0.29, 0.37)                |
|                                        | Girls                   | 362 | 0.33 (0.05, 0.60) <sup>d</sup>    | 0.39 (0.07, 0.72) <sup>d</sup>    | 0.44 (0.10, 0.77) <sup>d</sup>    |
|                                        | <i>p</i> <sub>int</sub> |     | 0.192                             | 0.196                             | 0.092                             |
| Head circumference (cm) <sup>b</sup>   | All                     | 745 | 0.11 (−0.02, 0.23)                | 0.06 (−0.09, 0.21)                | 0.12 (−0.03, 0.27)                |
|                                        | Boys                    | 383 | −0.02 (−0.19, 0.15)               | −0.08 (−0.29, 0.12)               | −0.04 (−0.26, 0.17)               |
|                                        | Girls                   | 362 | 0.25 (0.07, 0.43) <sup>d</sup>    | 0.21 (0.00, 0.42)                 | 0.29 (0.07, 0.51) <sup>d</sup>    |
|                                        | <i>p</i> <sub>int</sub> |     | 0.030                             | 0.049                             | 0.032                             |
| Gestational age (weeks) <sup>b</sup>   | All                     | 751 | 0.01 (−0.19, 0.22)                | −0.07 (−0.31, 0.17)               | 0.00 (−0.25, 0.25)                |
|                                        | Boys                    | 387 | −0.15 (−0.43, 0.13)               | −0.24 (−0.58, 0.10)               | −0.12 (−0.47, 0.23)               |
|                                        | Girls                   | 364 | 0.19 (−0.10, 0.48)                | 0.11 (−0.24, 0.45)                | 0.13 (−0.23, 0.49)                |
|                                        | <i>p</i> <sub>int</sub> |     | 0.095                             | 0.156                             | 0.338                             |
| Low birth weight <sup>c</sup>          | All                     | 750 | 0.82 (0.61, 1.10)                 | 0.74 (0.50, 1.09)                 | 0.87 (0.58, 1.31)                 |
|                                        | Boys                    | 387 | 1.03 (0.66, 1.61)                 | 0.89 (0.51, 1.56)                 | 1.05 (0.54, 2.05)                 |
|                                        | Girls                   | 363 | 0.70 (0.46, 1.05)                 | 0.65 (0.38, 1.10)                 | 0.76 (0.46, 1.27)                 |
|                                        | <i>p</i> <sub>int</sub> |     | 0.199                             | 0.417                             | 0.455                             |
| Preterm birth <sup>c</sup>             | All                     | 751 | 0.98 (0.76, 1.25)                 | 1.01 (0.75, 1.36)                 | 1.07 (0.79, 1.45)                 |
|                                        | Boys                    | 387 | 1.16 (0.83, 1.61)                 | 1.20 (0.80, 1.80)                 | 1.27 (0.82, 1.97)                 |
|                                        | Girls                   | 364 | 0.81 (0.56, 1.17)                 | 0.83 (0.54, 1.30)                 | 0.88 (0.58, 1.35)                 |
|                                        | <i>p</i> <sub>int</sub> |     | 0.157                             | 0.233                             | 0.244                             |
| Small for gestational age <sup>c</sup> | All                     | 750 | 0.95 (0.77, 1.17)                 | 0.88 (0.67, 1.14)                 | 0.93 (0.71, 1.21)                 |
|                                        | Boys                    | 387 | 0.92 (0.70, 1.21)                 | 0.92 (0.65, 1.29)                 | 0.93 (0.67, 1.31)                 |
|                                        | Girls                   | 363 | 0.99 (0.72, 1.37)                 | 0.81 (0.54, 1.22)                 | 0.91 (0.60, 1.40)                 |
|                                        | <i>p</i> <sub>int</sub> |     | 0.699                             | 0.644                             | 0.937                             |
| Large for gestational age <sup>c</sup> | All                     | 750 | 1.09 (0.71, 1.66)                 | 1.24 (0.79, 1.95)                 | 1.07 (0.63, 1.82)                 |
|                                        | Boys                    | 387 | 0.96 (0.57, 1.62)                 | 1.17 (0.66, 2.09)                 | 0.76 (0.35, 1.63)                 |
|                                        | Girls                   | 363 | 1.25 (0.62, 2.52)                 | 1.32 (0.63, 2.73)                 | 1.58 (0.80, 3.10)                 |
|                                        | <i>p</i> <sub>int</sub> |     | 0.572                             | 0.814                             | 0.160                             |

<sup>a</sup> Models adjusted for maternal age, education, marital status, smoking, alcohol use during pregnancy, post-delivery BMI, and HIV status; household income per capita and assets; child sex, parity, delivery method, and season of birth.

<sup>b</sup> Coefficients show the change in mean outcome for each 10-fold increase in maternal peripartum serum DDT/E concentration.

<sup>c</sup> Coefficients show the odd ratio for each 10-fold increase in maternal peripartum serum DDT/E concentration.

<sup>d</sup>  $P < 0.05$ .

**Web Table 4.** Associations between maternal peripartum urinary pyrethroid metabolite concentrations and birth outcomes in VHEMBE study participants based on standard multivariable regression models<sup>a</sup>

|                                        |                         | N   | <i>cis</i> -DBCA<br>β/OR (95% CI) | <i>cis</i> -DCCA<br>β/OR (95% CI) | <i>trans</i> -DCCA<br>β/OR (95% CI) | 3-PBA<br>β/OR (95% CI)         |
|----------------------------------------|-------------------------|-----|-----------------------------------|-----------------------------------|-------------------------------------|--------------------------------|
| Birth weight (g) <sup>b</sup>          | All                     | 738 | 18.2 (-41.0, 77.4)                | -9.6 (-77.6, 58.4)                | -5.3 (-64.6, 53.9)                  | 5.3 (-66.2, 76.8)              |
|                                        | Boys                    | 383 | -10.9 (-94.0, 72.2)               | -36.1 (-128.0, 55.7)              | -35.8 (-114.9, 43.4)                | -39.5 (-134.2, 55.1)           |
|                                        | Girls                   | 355 | 48.1 (-36.1, 132.3)               | 21.5 (-77.9, 120.9)               | 32.5 (-55.7, 120.7)                 | 62.9 (-44.2, 170.0)            |
|                                        | <i>p</i> <sub>int</sub> |     | 0.328                             | 0.399                             | 0.256                               | 0.157                          |
| Length (cm) <sup>b</sup>               | All                     | 733 | 0.11 (-0.18, 0.41)                | 0.04 (-0.30, 0.38)                | 0.02 (-0.28, 0.31)                  | 0.15 (-0.20, 0.51)             |
|                                        | Boys                    | 379 | 0.06 (-0.36, 0.48)                | -0.16 (-0.61, 0.30)               | -0.20 (-0.60, 0.19)                 | -0.04 (-0.51, 0.43)            |
|                                        | Girls                   | 354 | 0.17 (-0.25, 0.59)                | 0.28 (-0.22, 0.78)                | 0.29 (-0.15, 0.73)                  | 0.40 (-0.13, 0.93)             |
|                                        | <i>p</i> <sub>int</sub> |     | 0.712                             | 0.201                             | 0.100                               | 0.223                          |
| Head circumference (cm) <sup>b</sup>   | All                     | 733 | 0.07 (-0.12, 0.27)                | 0.01 (-0.21, 0.23)                | -0.02 (-0.21, 0.18)                 | -0.02 (-0.26, 0.21)            |
|                                        | Boys                    | 379 | -0.05 (-0.32, 0.22)               | -0.12 (-0.42, 0.18)               | -0.05 (-0.30, 0.21)                 | -0.14 (-0.45, 0.17)            |
|                                        | Girls                   | 354 | 0.20 (-0.08, 0.47)                | 0.17 (-0.16, 0.49)                | 0.02 (-0.26, 0.31)                  | 0.13 (-0.22, 0.47)             |
|                                        | <i>p</i> <sub>int</sub> |     | 0.205                             | 0.192                             | 0.715                               | 0.252                          |
| Gestational age (weeks) <sup>b</sup>   | All                     | 738 | 0.06 (-0.26, 0.37)                | 0.06 (-0.31, 0.42)                | 0.02 (-0.30, 0.34)                  | -0.03 (-0.41, 0.35)            |
|                                        | Boys                    | 383 | 0.04 (-0.40, 0.49)                | 0.05 (-0.44, 0.54)                | -0.02 (-0.44, 0.40)                 | -0.06 (-0.57, 0.44)            |
|                                        | Girls                   | 355 | 0.07 (-0.38, 0.52)                | 0.07 (-0.46, 0.59)                | 0.07 (-0.40, 0.54)                  | 0.01 (-0.56, 0.59)             |
|                                        | <i>p</i> <sub>int</sub> |     | 0.929                             | 0.959                             | 0.776                               | 0.838                          |
| Low birth weight <sup>c</sup>          | All                     | 738 | 0.79 (0.48, 1.30)                 | 0.74 (0.47, 1.18)                 | 0.83 (0.55, 1.25)                   | 0.68 (0.41, 1.15)              |
|                                        | Boys                    | 383 | 0.74 (0.34, 1.61)                 | 0.96 (0.47, 1.97)                 | 1.03 (0.57, 1.85)                   | 1.00 (0.46, 2.19)              |
|                                        | Girls                   | 355 | 0.82 (0.43, 1.56)                 | 0.61 (0.34, 1.10)                 | 0.69 (0.40, 1.21)                   | 0.49 (0.25, 0.98) <sup>d</sup> |
|                                        | <i>p</i> <sub>int</sub> |     | 0.846                             | 0.337                             | 0.339                               | 0.177                          |
| Preterm birth <sup>c</sup>             | All                     | 738 | 0.98 (0.67, 1.44)                 | 0.87 (0.59, 1.28)                 | 1.01 (0.72, 1.41)                   | 1.03 (0.68, 1.55)              |
|                                        | Boys                    | 383 | 1.09 (0.63, 1.87)                 | 1.01 (0.61, 1.68)                 | 1.16 (0.76, 1.77)                   | 1.16 (0.68, 1.97)              |
|                                        | Girls                   | 355 | 0.88 (0.50, 1.55)                 | 0.71 (0.39, 1.30)                 | 0.83 (0.48, 1.44)                   | 0.88 (0.46, 1.66)              |
|                                        | <i>p</i> <sub>int</sub> |     | 0.593                             | 0.380                             | 0.343                               | 0.507                          |
| Small for gestational age <sup>c</sup> | All                     | 738 | 1.03 (0.74, 1.44)                 | 0.97 (0.68, 1.39)                 | 1.02 (0.75, 1.39)                   | 1.04 (0.72, 1.52)              |
|                                        | Boys                    | 383 | 1.36 (0.88, 2.09)                 | 1.25 (0.80, 1.94)                 | 1.24 (0.84, 1.82)                   | 1.33 (0.85, 2.10)              |
|                                        | Girls                   | 355 | 0.68 (0.38, 1.22)                 | 0.64 (0.35, 1.18)                 | 0.73 (0.42, 1.25)                   | 0.68 (0.35, 1.30)              |
|                                        | <i>p</i> <sub>int</sub> |     | 0.060                             | 0.086                             | 0.118                               | 0.097                          |
| Large for gestational age <sup>c</sup> | All                     | 738 | 0.70 (0.38, 1.28)                 | 0.93 (0.48, 1.81)                 | 0.96 (0.53, 1.76)                   | 0.94 (0.46, 1.95)              |
|                                        | Boys                    | 383 | 0.71 (0.30, 1.68)                 | 1.21 (0.51, 2.87)                 | 1.20 (0.53, 2.72)                   | 1.08 (0.40, 2.95)              |
|                                        | Girls                   | 355 | 0.69 (0.28, 1.67)                 | 0.66 (0.25, 1.73)                 | 0.71 (0.31, 1.62)                   | 0.79 (0.30, 2.10)              |
|                                        | <i>p</i> <sub>int</sub> |     | 0.958                             | 0.361                             | 0.375                               | 0.657                          |

<sup>a</sup> Models adjusted for maternal age, education, marital status, smoking, alcohol use during pregnancy, post-delivery BMI, and HIV status; household income per capita and assets; child sex, parity, delivery method, and season of birth.

<sup>b</sup> Coefficients show the change in mean outcome for each 10-fold increase in maternal peripartum pyrethroid metabolite concentration.

<sup>c</sup> Coefficients show the odd ratio for each 10-fold increase in maternal peripartum pyrethroid metabolite concentration.

**Web Table 5.** Associations between maternal peripartum serum DDT/E concentrations and birth outcomes in VHEMBE study participants based on propensity score models<sup>a</sup>

|                                        |                         | N   | <i>p,p'</i> -DDT<br>β/OR (95% CI) | <i>p,p'</i> -DDE<br>β/OR (95% CI) | <i>o,p'</i> -DDT<br>β/OR (95% CI) |
|----------------------------------------|-------------------------|-----|-----------------------------------|-----------------------------------|-----------------------------------|
| Birth weight (g) <sup>b</sup>          | All                     | 750 | 15.8 (-24.0, 55.6)                | 11.6 (-36.8, 60.0)                | 12.6 (-37.5, 62.6)                |
|                                        | Boys                    | 387 | -26.2 (-80.4, 27.9)               | -28.7 (-95.0, 37.7)               | -39.4 (-107.2, 28.4)              |
|                                        | Girls                   | 363 | 69.0 (11.4, 126.7) <sup>d</sup>   | 59.8 (-9.3, 128.9)                | 79.0 (6.9, 151.1) <sup>d</sup>    |
|                                        | <i>p</i> <sub>int</sub> |     | 0.018                             | 0.068                             | 0.018                             |
| Length (cm) <sup>b</sup>               | All                     | 745 | 0.20 (0.00, 0.39)                 | 0.21 (-0.03, 0.45)                | 0.22 (-0.03, 0.47)                |
|                                        | Boys                    | 383 | 0.04 (-0.22, 0.31)                | 0.05 (-0.28, 0.37)                | 0.01 (-0.33, 0.35)                |
|                                        | Girls                   | 362 | 0.42 (0.14, 0.70) <sup>d</sup>    | 0.42 (0.08, 0.76) <sup>d</sup>    | 0.50 (0.15, 0.86) <sup>d</sup>    |
|                                        | <i>p</i> <sub>int</sub> |     | 0.056                             | 0.116                             | 0.045                             |
| Head circumference (cm) <sup>b</sup>   | All                     | 745 | 0.10 (-0.04, 0.23)                | 0.02 (-0.14, 0.18)                | 0.09 (-0.08, 0.26)                |
|                                        | Boys                    | 383 | -0.04 (-0.22, 0.13)               | -0.13 (-0.35, 0.08)               | -0.07 (-0.29, 0.15)               |
|                                        | Girls                   | 362 | 0.31 (0.12, 0.49) <sup>d</sup>    | 0.22 (-0.01, 0.44)                | 0.32 (0.09, 0.56) <sup>d</sup>    |
|                                        | <i>p</i> <sub>int</sub> |     | 0.007                             | 0.026                             | 0.016                             |
| Gestational age (weeks) <sup>b</sup>   | All                     | 751 | 0.03 (-0.18, 0.23)                | -0.08 (-0.33, 0.17)               | 0.00 (-0.26, 0.26)                |
|                                        | Boys                    | 387 | -0.17 (-0.45, 0.11)               | -0.27 (-0.61, 0.08)               | -0.14 (-0.49, 0.21)               |
|                                        | Girls                   | 364 | 0.26 (-0.04, 0.56)                | 0.12 (-0.24, 0.47)                | 0.16 (-0.21, 0.53)                |
|                                        | <i>p</i> <sub>int</sub> |     | 0.036                             | 0.122                             | 0.237                             |
| Low birth weight <sup>c</sup>          | All                     | 750 | 0.84 (0.60, 1.20)                 | 0.77 (0.52, 1.13)                 | 0.90 (0.60, 1.34)                 |
|                                        | Boys                    | 387 | 1.12 (0.65, 1.93)                 | 0.91 (0.50, 1.67)                 | 1.06 (0.57, 1.98)                 |
|                                        | Girls                   | 363 | 0.66 (0.41, 1.05)                 | 0.67 (0.40, 1.10)                 | 0.76 (0.44, 1.28)                 |
|                                        | <i>p</i> <sub>int</sub> |     | 0.153                             | 0.438                             | 0.417                             |
| Preterm birth <sup>c</sup>             | All                     | 751 | 0.96 (0.74, 1.24)                 | 1.06 (0.77, 1.44)                 | 1.08 (0.77, 1.52)                 |
|                                        | Boys                    | 387 | 1.17 (0.83, 1.66)                 | 1.28 (0.83, 1.96)                 | 1.33 (0.84, 2.10)                 |
|                                        | Girls                   | 364 | 0.76 (0.52, 1.11)                 | 0.86 (0.55, 1.35)                 | 0.86 (0.52, 1.41)                 |
|                                        | <i>p</i> <sub>int</sub> |     | 0.100                             | 0.207                             | 0.197                             |
| Small for gestational age <sup>c</sup> | All                     | 750 | 0.93 (0.75, 1.14)                 | 0.85 (0.67, 1.08)                 | 0.90 (0.70, 1.16)                 |
|                                        | Boys                    | 387 | 0.94 (0.72, 1.23)                 | 0.92 (0.67, 1.25)                 | 0.95 (0.68, 1.31)                 |
|                                        | Girls                   | 363 | 0.97 (0.69, 1.35)                 | 0.79 (0.54, 1.16)                 | 0.90 (0.60, 1.36)                 |
|                                        | <i>p</i> <sub>int</sub> |     | 0.908                             | 0.557                             | 0.857                             |
| Large for gestational age <sup>c</sup> | All                     | 750 | 1.01 (0.71, 1.45)                 | 1.20 (0.73, 1.96)                 | 0.96 (0.60, 1.52)                 |
|                                        | Boys                    | 387 | 0.94 (0.57, 1.53)                 | 1.08 (0.56, 2.08)                 | 0.68 (0.35, 1.32)                 |
|                                        | Girls                   | 363 | 1.12 (0.65, 1.91)                 | 1.36 (0.66, 2.83)                 | 1.45 (0.71, 2.98)                 |
|                                        | <i>p</i> <sub>int</sub> |     | 0.636                             | 0.636                             | 0.137                             |



<sup>a</sup> Propensity scores and inverse probability of treatment weights were based on conditional probability density functions determined using the Super Learner algorithm.

<sup>b</sup> Coefficients show the change in mean outcome for each 10-fold increase in maternal peripartum serum DDT/E or pyrethroid metabolite concentration.

<sup>c</sup> Coefficients show the odd ratio for each 10-fold increase in maternal peripartum serum DDT/E concentration.

<sup>d</sup>  $P < 0.05$ .

**Web Table 6.** Associations between maternal peripartum urinary pyrethroid metabolite concentrations and birth outcomes in VHEMBE study participants based on propensity score models<sup>a</sup>

|                                        |                  |     | <i>cis</i> -DBCA     | <i>cis</i> -DCCA    | <i>trans</i> -DCCA   | 3-PBA                |
|----------------------------------------|------------------|-----|----------------------|---------------------|----------------------|----------------------|
|                                        | N                |     | β/OR (95% CI)        | β/OR (95% CI)       | β/OR (95% CI)        | β/OR (95% CI)        |
| Birth weight (g) <sup>b</sup>          | All              | 738 | 24.4 (-38.3, 87.2)   | 4.0 (-67.3, 75.2)   | -5.0 (-67.9, 57.8)   | 19.9 (-54.0, 93.8)   |
|                                        | Boys             | 383 | -19.6 (-105.9, 66.6) | -7.0 (-102.8, 88.9) | -27.4 (-111.4, 56.6) | -24.4 (-122.3, 73.4) |
|                                        | Girls            | 355 | 70.0 (-20.7, 160.7)  | 17.6 (-86.9, 122.0) | 21.2 (-71.2, 113.7)  | 74.3 (-37.5, 186.1)  |
|                                        | p <sub>int</sub> |     | 0.160                | 0.732               | 0.441                | 0.192                |
| Length (cm) <sup>b</sup>               | All              | 733 | 0.04 (-0.27, 0.36)   | 0.02 (-0.33, 0.38)  | -0.05 (-0.36, 0.26)  | 0.13 (-0.23, 0.50)   |
|                                        | Boys             | 379 | -0.09 (-0.52, 0.34)  | -0.15 (-0.62, 0.32) | -0.25 (-0.66, 0.16)  | -0.09 (-0.57, 0.38)  |
|                                        | Girls            | 354 | 0.16 (-0.29, 0.60)   | 0.24 (-0.28, 0.75)  | 0.18 (-0.27, 0.63)   | 0.39 (-0.15, 0.94)   |
|                                        | p <sub>int</sub> |     | 0.427                | 0.277               | 0.160                | 0.187                |
| Head circumference (cm) <sup>b</sup>   | All              | 733 | 0.02 (-0.19, 0.23)   | -0.02 (-0.25, 0.22) | -0.07 (-0.28, 0.13)  | -0.03 (-0.27, 0.21)  |
|                                        | Boys             | 379 | -0.17 (-0.45, 0.11)  | -0.11 (-0.42, 0.20) | -0.10 (-0.38, 0.17)  | -0.17 (-0.49, 0.14)  |
|                                        | Girls            | 354 | 0.19 (-0.10, 0.49)   | 0.10 (-0.24, 0.44)  | -0.04 (-0.34, 0.26)  | 0.12 (-0.24, 0.49)   |
|                                        | p <sub>int</sub> |     | 0.079                | 0.360               | 0.757                | 0.226                |
| Gestational age (weeks) <sup>b</sup>   | All              | 738 | -0.04 (-0.36, 0.28)  | 0.13 (-0.24, 0.49)  | 0.06 (-0.26, 0.38)   | 0.00 (-0.38, 0.37)   |
|                                        | Boys             | 383 | -0.10 (-0.54, 0.34)  | 0.14 (-0.35, 0.63)  | 0.04 (-0.39, 0.47)   | -0.06 (-0.56, 0.44)  |
|                                        | Girls            | 355 | 0.01 (-0.45, 0.48)   | 0.11 (-0.42, 0.64)  | 0.08 (-0.39, 0.56)   | 0.07 (-0.50, 0.64)   |
|                                        | p <sub>int</sub> |     | 0.735                | 0.933               | 0.888                | 0.726                |
| Low birth weight <sup>c</sup>          | All              | 738 | 0.75 (0.45, 1.26)    | 0.63 (0.30, 1.30)   | 0.80 (0.43, 1.48)    | 0.62 (0.32, 1.22)    |
|                                        | Boys             | 383 | 0.81 (0.36, 1.80)    | 0.84 (0.28, 2.53)   | 1.12 (0.43, 2.93)    | 1.05 (0.38, 2.88)    |
|                                        | Girls            | 355 | 0.72 (0.37, 1.41)    | 0.51 (0.20, 1.33)   | 0.63 (0.27, 1.43)    | 0.42 (0.17, 1.06)    |
|                                        | p <sub>int</sub> |     | 0.828                | 0.503               | 0.373                | 0.198                |
| Preterm birth <sup>c</sup>             | All              | 738 | 1.07 (0.69, 1.66)    | 0.82 (0.50, 1.36)   | 1.01 (0.65, 1.58)    | 1.03 (0.62, 1.73)    |
|                                        | Boys             | 383 | 1.27 (0.69, 2.34)    | 0.99 (0.51, 1.94)   | 1.25 (0.69, 2.26)    | 1.28 (0.64, 2.54)    |
|                                        | Girls            | 355 | 0.88 (0.47, 1.68)    | 0.66 (0.31, 1.39)   | 0.78 (0.40, 1.52)    | 0.79 (0.36, 1.72)    |
|                                        | p <sub>int</sub> |     | 0.419                | 0.420               | 0.302                | 0.364                |
| Small for gestational age <sup>c</sup> | All              | 738 | 1.01 (0.74, 1.38)    | 1.02 (0.70, 1.49)   | 1.09 (0.78, 1.51)    | 1.09 (0.74, 1.61)    |
|                                        | Boys             | 383 | 1.30 (0.86, 1.96)    | 1.25 (0.78, 2.02)   | 1.29 (0.85, 1.95)    | 1.33 (0.81, 2.18)    |
|                                        | Girls            | 355 | 0.67 (0.40, 1.11)    | 0.71 (0.38, 1.35)   | 0.82 (0.47, 1.41)    | 0.72 (0.37, 1.41)    |
|                                        | p <sub>int</sub> |     | 0.045                | 0.165               | 0.195                | 0.147                |
| Large for gestational age <sup>c</sup> | All              | 738 | 0.83 (0.43, 1.60)    | 0.86 (0.43, 1.72)   | 0.90 (0.50, 1.64)    | 0.97 (0.49, 1.94)    |
|                                        | Boys             | 383 | 0.82 (0.34, 2.00)    | 1.18 (0.47, 2.97)   | 1.15 (0.52, 2.56)    | 1.16 (0.46, 2.90)    |
|                                        | Girls            | 355 | 0.84 (0.32, 2.21)    | 0.56 (0.19, 1.67)   | 0.65 (0.26, 1.66)    | 0.76 (0.26, 2.23)    |
|                                        | p <sub>int</sub> |     | 0.969                | 0.310               | 0.364                | 0.561                |

<sup>a</sup> Propensity scores and inverse probability of treatment weights were based on conditional probability density functions determined using the Super Learner algorithm.

<sup>b</sup> Coefficients show the change in mean outcome for each 10-fold increase in maternal peripartum pyrethroid metabolite concentration.

<sup>c</sup> Coefficients show the odd ratio for each 10-fold increase in maternal peripartum pyrethroid metabolite concentration.

**Web Table 7.** Direct, indirect (mediated by duration of gestation) and total effects of DDT/E on birth size based on the Baron and Kenny approach among girls participating in the VHEMBE study, Limpopo, South Africa<sup>a</sup>

|                                 |                  | Direct <sup>b</sup>            | Indirect <sup>b</sup> | Total <sup>b</sup>             |
|---------------------------------|------------------|--------------------------------|-----------------------|--------------------------------|
| Birth weight (g) (n=363)        | <i>p,p'</i> -DDT | 42.1 (-11.1, 95.2)             | 12.8 (-6.3, 32.0)     | 54.9 (-0.6, 110.4)             |
|                                 | <i>p,p'</i> -DDE | 53.6 (-5.7, 113.0)             | 7.3 (-16.8, 31.4)     | 60.9 (-4.1, 126.0)             |
|                                 | <i>o,p'</i> -DDT | 61.0 (-2.1, 124.1)             | 8.5 (-15.3, 32.2)     | 69.5 (3.1, 135.8) <sup>c</sup> |
| Length (cm) (n=362)             | <i>p,p'</i> -DDT | 0.27 (0.00, 0.54)              | 0.06 (-0.03, 0.14)    | 0.33 (0.04, 0.61) <sup>c</sup> |
|                                 | <i>p,p'</i> -DDE | 0.36 (0.07, 0.66) <sup>c</sup> | 0.03 (-0.07, 0.14)    | 0.39 (0.08, 0.71) <sup>c</sup> |
|                                 | <i>o,p'</i> -DDT | 0.40 (0.07, 0.74) <sup>c</sup> | 0.04 (-0.07, 0.14)    | 0.44 (0.08, 0.79) <sup>c</sup> |
| Head circumference (cm) (n=362) | <i>p,p'</i> -DDT | 0.22 (0.05, 0.38) <sup>c</sup> | 0.03 (-0.02, 0.08)    | 0.25 (0.08, 0.42) <sup>c</sup> |
|                                 | <i>p,p'</i> -DDE | 0.19 (0.01, 0.37) <sup>c</sup> | 0.02 (-0.04, 0.08)    | 0.21 (0.02, 0.40) <sup>c</sup> |
|                                 | <i>o,p'</i> -DDT | 0.27 (0.08, 0.46) <sup>c</sup> | 0.02 (-0.04, 0.08)    | 0.29 (0.10, 0.48) <sup>c</sup> |

<sup>a</sup> Models adjusted for maternal age, education, marital status, smoking, alcohol use during pregnancy, post-delivery BMI, and HIV status; household income per capita and assets; child parity, delivery method, and season of birth.

<sup>b</sup> Coefficients show the change in mean outcome for each 10-fold increase in maternal peripartum serum DDT/E concentration.

<sup>c</sup>  $P < 0.05$ .

**Web Table 8.** Direct, indirect (mediated by duration of gestation) and total effects of DDT/E on birth size based on the counterfactual framework approach among girls participating in the VHEMBE study, Limpopo, South Africa<sup>a</sup>

|                                 |                  | Controlled<br>Direct Effect <sup>b</sup> | Natural<br>Direct Effect <sup>b</sup> | Natural<br>Indirect Effect <sup>b</sup> | Total Effect <sup>b</sup>      | P <sub>int</sub> <sup>c</sup> |
|---------------------------------|------------------|------------------------------------------|---------------------------------------|-----------------------------------------|--------------------------------|-------------------------------|
| Birth weight (g) (n=363)        | <i>p,p'</i> -DDT | 43.2 (-10.1, 95.0)                       | 40.7 (-11.2, 92.3)                    | 12.6 (-8.1, 39.2)                       | 53.3 (2.7, 108.6) <sup>d</sup> | 0.555                         |
|                                 | <i>p,p'</i> -DDE | 57.5 (0.5, 117.3) <sup>d</sup>           | 54.8 (-2.5, 111.9)                    | 7.1 (-21.3, 37.4)                       | 61.9 (-5.7, 126.6)             | 0.530                         |
|                                 | <i>o,p'</i> -DDT | 75.0 (6.5, 136.9) <sup>d</sup>           | 68.0 (-0.4, 130.4)                    | 6.3 (-14.4, 29.0)                       | 74.3 (2.0, 139.7) <sup>d</sup> | 0.326                         |
| Length (cm) (n=362)             | <i>p,p'</i> -DDT | 0.30 (0.01, 0.57) <sup>d</sup>           | 0.28 (0.00, 0.55)                     | 0.05 (-0.03, 0.18)                      | 0.33 (0.04, 0.62) <sup>d</sup> | 0.501                         |
|                                 | <i>p,p'</i> -DDE | 0.39 (0.09, 0.69) <sup>d</sup>           | 0.37 (0.07, 0.66) <sup>d</sup>        | 0.03 (-0.08, 0.17)                      | 0.40 (0.07, 0.72) <sup>d</sup> | 0.435                         |
|                                 | <i>o,p'</i> -DDT | 0.51 (0.13, 0.86) <sup>d</sup>           | 0.47 (0.10, 0.81) <sup>d</sup>        | 0.02 (-0.05, 0.12)                      | 0.49 (0.11, 0.86) <sup>d</sup> | 0.311                         |
| Head circumference (cm) (n=362) | <i>p,p'</i> -DDT | 0.25 (0.08, 0.41) <sup>d</sup>           | 0.24 (0.08, 0.40) <sup>d</sup>        | 0.03 (-0.02, 0.10)                      | 0.27 (0.10, 0.44) <sup>d</sup> | 0.663                         |
|                                 | <i>p,p'</i> -DDE | 0.21 (0.02, 0.41) <sup>d</sup>           | 0.20 (0.02, 0.39) <sup>d</sup>        | 0.02 (-0.05, 0.10)                      | 0.22 (0.02, 0.42) <sup>d</sup> | 0.641                         |
|                                 | <i>o,p'</i> -DDT | 0.32 (0.12, 0.53) <sup>d</sup>           | 0.31 (0.11, 0.51) <sup>d</sup>        | 0.01 (-0.04, 0.07)                      | 0.32 (0.11, 0.53) <sup>d</sup> | 0.369                         |

<sup>a</sup> Models adjusted for maternal age, education, marital status, smoking, alcohol use during pregnancy, post-delivery BMI, and HIV status; household income per capita and assets; child sex, parity, delivery method, and season of birth.

<sup>b</sup> Coefficients show the change in mean outcome for each 10-fold increase in maternal peripartum serum DDT/E concentration.

<sup>c</sup> *P* value for exposure/mediator interaction.

<sup>d</sup> *P* < 0.05.

**Web Table 9.** Interactions by household poverty status for associations between maternal peripartum serum DDT/E concentrations and birth outcomes in VHEMBE study participants based on marginal structural models<sup>a</sup>

|                                        |           | N   | $p, p'$ -DDT<br>β/OR (95% CI) | $p, p'$ -DDE<br>β/OR (95% CI)  | $o, p'$ -DDT<br>β/OR (95% CI) |
|----------------------------------------|-----------|-----|-------------------------------|--------------------------------|-------------------------------|
| Birth weight (g) <sup>b</sup>          | All       | 750 | 12.2 (-24.5, 49.7)            | 10.5 (-36.9, 58.1)             | 11.4 (-36.0, 60.6)            |
|                                        | Poor      | 459 | 32.0 (-16.7, 82.6)            | 41.5 (-17.6, 98.3)             | 19.7 (-41.8, 83.3)            |
|                                        | Not Poor  | 291 | -14.7 (-74.2, 42.7)           | -49.2 (-125.4, 25.2)           | -3.1 (-80.7, 73.2)            |
|                                        | $p_{int}$ |     | 0.194                         | 0.066                          | 0.606                         |
| Length (cm) <sup>b</sup>               | All       | 745 | 0.16 (-0.04, 0.36)            | 0.20 (-0.04, 0.44)             | 0.20 (-0.05, 0.45)            |
|                                        | Poor      | 458 | 0.19 (-0.01, 0.42)            | 0.23 (-0.05, 0.48)             | 0.23 (-0.04, 0.50)            |
|                                        | Not Poor  | 287 | 0.09 (-0.21, 0.47)            | 0.15 (-0.28, 0.60)             | 0.08 (-0.36, 0.55)            |
|                                        | $p_{int}$ |     | 0.640                         | 0.758                          | 0.606                         |
| Head circumference (cm) <sup>b</sup>   | All       | 745 | 0.07 (-0.05, 0.19)            | 0.02 (-0.12, 0.16)             | 0.09 (-0.05, 0.24)            |
|                                        | Poor      | 458 | 0.06 (-0.10, 0.21)            | 0.00 (-0.18, 0.18)             | 0.06 (-0.11, 0.25)            |
|                                        | Not Poor  | 287 | 0.10 (-0.08, 0.29)            | 0.06 (-0.17, 0.31)             | 0.14 (-0.11, 0.41)            |
|                                        | $p_{int}$ |     | 0.750                         | 0.652                          | 0.624                         |
| Gestational age (weeks) <sup>b</sup>   | All       | 751 | -0.02 (-0.21, 0.18)           | -0.08 (-0.34, 0.15)            | -0.04 (-0.29, 0.20)           |
|                                        | Poor      | 460 | -0.03 (-0.29, 0.23)           | -0.11 (-0.40, 0.18)            | -0.08 (-0.40, 0.21)           |
|                                        | Not Poor  | 291 | -0.03 (-0.30, 0.27)           | -0.04 (-0.46, 0.36)            | 0.06 (-0.36, 0.50)            |
|                                        | $p_{int}$ |     | 1.000                         | 0.826                          | 0.614                         |
| Low birth weight <sup>c</sup>          | All       | 750 | 0.81 (0.60, 1.08)             | 0.78 (0.53, 1.16)              | 0.90 (0.62, 1.32)             |
|                                        | Poor      | 459 | 0.75 (0.51, 1.08)             | 0.72 (0.44, 1.12)              | 0.85 (0.55, 1.32)             |
|                                        | Not Poor  | 291 | 0.88 (0.49, 1.53)             | 0.97 (0.50, 1.88)              | 0.99 (0.48, 2.06)             |
|                                        | $p_{int}$ |     | 0.598                         | 0.480                          | 0.640                         |
| Preterm birth <sup>c</sup>             | All       | 751 | 0.97 (0.74, 1.27)             | 1.04 (0.75, 1.41)              | 1.06 (0.77, 1.48)             |
|                                        | Poor      | 460 | 1.02 (0.71, 1.46)             | 1.01 (0.69, 1.48)              | 1.10 (0.72, 1.66)             |
|                                        | Not Poor  | 291 | 0.94 (0.61, 1.41)             | 1.08 (0.62, 1.82)              | 1.01 (0.60, 1.72)             |
|                                        | $p_{int}$ |     | 0.786                         | 0.838                          | 0.832                         |
| Small for gestational age <sup>c</sup> | All       | 750 | 0.92 (0.73, 1.16)             | 0.87 (0.66, 1.10)              | 0.89 (0.68, 1.16)             |
|                                        | Poor      | 459 | 0.87 (0.66, 1.13)             | 0.73 (0.53, 0.98) <sup>d</sup> | 0.89 (0.63, 1.21)             |
|                                        | Not Poor  | 291 | 0.95 (0.59, 1.56)             | 1.28 (0.83, 2.07)              | 0.86 (0.52, 1.47)             |
|                                        | $p_{int}$ |     | 0.632                         | 0.030                          | 0.964                         |
| Large for gestational age <sup>c</sup> | All       | 750 | 1.02 (0.69, 1.51)             | 1.13 (0.72, 1.80)              | 0.94 (0.54, 1.57)             |
|                                        | Poor      | 459 | 1.28 (0.74, 2.23)             | 1.33 (0.73, 2.68)              | 1.14 (0.56, 2.27)             |
|                                        | Not Poor  | 291 | 0.80 (0.46, 1.36)             | 0.83 (0.41, 1.61)              | 0.69 (0.33, 1.40)             |
|                                        | $p_{int}$ |     | 0.222                         | 0.322                          | 0.320                         |

<sup>a</sup> Propensity scores and inverse probability of treatment weights were based on conditional probability density functions determined using the Super Learner algorithm.

<sup>b</sup> Coefficients show the change in mean outcome for each 10-fold increase in maternal peripartum serum DDT/E concentration.

<sup>c</sup> Coefficients show the odd ratio for each 10-fold increase in maternal peripartum serum DDT/E concentration.

<sup>d</sup>  $P < 0.05$ .

**Web Table 10.** Interactions by household poverty status for associations between maternal peripartum urinary pyrethroid metabolite concentrations and birth outcomes in VHEMBE study participants based on marginal structural models<sup>a</sup>

|                                        |                  |     | <i>cis</i> -DBCA     | <i>cis</i> -DCCA               | <i>trans</i> -DCCA   | 3-PBA                          |
|----------------------------------------|------------------|-----|----------------------|--------------------------------|----------------------|--------------------------------|
|                                        |                  | N   | β/OR (95% CI)        | β/OR (95% CI)                  | β/OR (95% CI)        | β/OR (95% CI)                  |
| Birth weight (g) <sup>b</sup>          | All              | 738 | 4.8 (−65.4, 79.8)    | 15.8 (−52.9, 83.4)             | 5.2 (−57.0, 65.1)    | 7.5 (−83.3, 99.8)              |
|                                        | Poor             | 450 | 15.3 (−71.8, 113.0)  | 26.7 (−65.0, 118.4)            | 21.7 (−56.8, 98.1)   | 1.5 (−114.9, 122.3)            |
|                                        | Not Poor         | 288 | −11.1 (−120.3, 96.9) | 2.8 (−99.8, 95.6)              | −25.9 (−120.8, 53.2) | 26.1 (−96.0, 147.7)            |
|                                        | p <sub>int</sub> |     | 0.670                | 0.676                          | 0.380                | 0.768                          |
| Length (cm) <sup>b</sup>               | All              | 733 | 0.03 (−0.26, 0.33)   | 0.11 (−0.18, 0.37)             | 0.02 (−0.24, 0.26)   | 0.12 (−0.20, 0.45)             |
|                                        | Poor             | 449 | −0.01 (−0.35, 0.35)  | 0.08 (−0.26, 0.39)             | 0.04 (−0.26, 0.32)   | 0.05 (−0.36, 0.46)             |
|                                        | Not Poor         | 284 | 0.11 (−0.43, 0.67)   | 0.16 (−0.35, 0.63)             | −0.02 (−0.51, 0.40)  | 0.29 (−0.26, 0.85)             |
|                                        | p <sub>int</sub> |     | 0.728                | 0.774                          | 0.856                | 0.506                          |
| Head circumference (cm) <sup>b</sup>   | All              | 733 | 0.04 (−0.20, 0.27)   | 0.06 (−0.20, 0.28)             | −0.02 (−0.25, 0.18)  | −0.01 (−0.30, 0.27)            |
|                                        | Poor             | 449 | 0.07 (−0.20, 0.34)   | 0.06 (−0.19, 0.30)             | −0.01 (−0.24, 0.21)  | −0.03 (−0.35, 0.29)            |
|                                        | Not Poor         | 284 | 0.01 (−0.41, 0.38)   | 0.08 (−0.41, 0.49)             | −0.02 (−0.53, 0.39)  | 0.05 (−0.55, 0.52)             |
|                                        | p <sub>int</sub> |     | 0.824                | 0.920                          | 0.980                | 0.834                          |
| Gestational age (weeks) <sup>b</sup>   | All              | 738 | −0.11 (−0.49, 0.27)  | 0.07 (−0.26, 0.39)             | 0.01 (−0.27, 0.29)   | −0.11 (−0.56, 0.29)            |
|                                        | Poor             | 450 | −0.16 (−0.64, 0.32)  | 0.08 (−0.36, 0.49)             | −0.03 (−0.42, 0.33)  | −0.09 (−0.66, 0.48)            |
|                                        | Not Poor         | 288 | 0.03 (−0.49, 0.54)   | 0.07 (−0.42, 0.56)             | 0.09 (−0.37, 0.55)   | −0.11 (−0.66, 0.45)            |
|                                        | p <sub>int</sub> |     | 0.666                | 0.962                          | 0.672                | 0.954                          |
| Low birth weight <sup>c</sup>          | All              | 738 | 0.97 (0.45, 2.01)    | 0.70 (0.41, 1.12)              | 0.81 (0.51, 1.22)    | 0.73 (0.36, 1.56)              |
|                                        | Poor             | 450 | 1.02 (0.40, 2.22)    | 0.84 (0.43, 1.53)              | 0.85 (0.49, 1.35)    | 0.87 (0.35, 2.19)              |
|                                        | Not Poor         | 288 | 0.82 (0.25, 2.32)    | 0.42 (0.18, 0.82) <sup>d</sup> | 0.71 (0.29, 1.51)    | 0.40 (0.16, 0.89) <sup>d</sup> |
|                                        | p <sub>int</sub> |     | 0.742                | 0.150                          | 0.676                | 0.212                          |
| Preterm birth <sup>c</sup>             | All              | 738 | 1.11 (0.69, 1.82)    | 0.83 (0.52, 1.27)              | 0.98 (0.67, 1.44)    | 1.12 (0.66, 1.99)              |
|                                        | Poor             | 450 | 1.11 (0.56, 2.04)    | 0.80 (0.43, 1.47)              | 1.07 (0.65, 1.75)    | 1.10 (0.47, 2.32)              |
|                                        | Not Poor         | 288 | 1.04 (0.59, 1.91)    | 0.86 (0.44, 1.54)              | 0.84 (0.47, 1.42)    | 1.10 (0.57, 2.10)              |
|                                        | p <sub>int</sub> |     | 0.942                | 0.858                          | 0.498                | 0.984                          |
| Small for gestational age <sup>c</sup> | All              | 738 | 0.97 (0.70, 1.33)    | 0.91 (0.65, 1.32)              | 0.99 (0.72, 1.36)    | 1.01 (0.71, 1.49)              |
|                                        | Poor             | 450 | 0.84 (0.57, 1.23)    | 0.87 (0.57, 1.41)              | 0.94 (0.66, 1.39)    | 1.00 (0.65, 1.59)              |
|                                        | Not Poor         | 288 | 1.45 (0.75, 2.75)    | 1.01 (0.55, 1.90)              | 1.12 (0.63, 2.03)    | 1.04 (0.51, 2.16)              |
|                                        | p <sub>int</sub> |     | 0.164                | 0.664                          | 0.620                | 0.986                          |
| Large for gestational age <sup>c</sup> | All              | 738 | 0.78 (0.47, 1.34)    | 0.91 (0.45, 1.70)              | 0.91 (0.49, 1.61)    | 0.88 (0.39, 1.84)              |
|                                        | Poor             | 450 | 0.71 (0.34, 1.48)    | 0.60 (0.26, 1.41)              | 0.84 (0.39, 1.71)    | 0.67 (0.26, 1.68)              |
|                                        | Not Poor         | 288 | 0.89 (0.37, 1.86)    | 1.63 (0.50, 4.70)              | 1.06 (0.30, 2.83)    | 1.58 (0.33, 6.35)              |
|                                        | p <sub>int</sub> |     | 0.630                | 0.156                          | 0.794                | 0.384                          |



<sup>a</sup> Propensity scores and inverse probability of treatment weights were based on conditional probability density functions determined using the Super Learner algorithm.

<sup>b</sup> Coefficients show the change in mean outcome for each 10-fold increase in maternal peripartum pyrethroid metabolite concentration.

<sup>c</sup> Coefficients show the odd ratio for each 10-fold increase in maternal peripartum pyrethroid metabolite concentration.

<sup>d</sup>  $P < 0.05$ .

**Web Table 11.** Interactions by household poverty status for associations between maternal peripartum serum DDT/E concentrations and birth outcomes in VHEMBE study participants based on standard multivariable regression models<sup>a</sup>

|                                        |                         | N   | <i>p,p'</i> -DDT<br>β/OR (95% CI) | <i>p,p'</i> -DDE<br>β/OR (95% CI) | <i>o,p'</i> -DDT<br>β/OR (95% CI) |
|----------------------------------------|-------------------------|-----|-----------------------------------|-----------------------------------|-----------------------------------|
| Birth weight (g) <sup>b</sup>          | All                     | 750 | 18.8 (-19.4, 56.9)                | 24.2 (-21.2, 69.6)                | 19.3 (-27.7, 66.3)                |
|                                        | Poor                    | 459 | 45.2 (-3.4, 93.8)                 | 57.5 (1.6, 113.3) <sup>d</sup>    | 30.3 (-27.3, 87.8)                |
|                                        | Not Poor                | 291 | -23.5 (-83.9, 36.9)               | -40.0 (-117.0, 36.9)              | -3.4 (-84.1, 77.3)                |
|                                        | <i>p</i> <sub>int</sub> |     | 0.080                             | 0.044                             | 0.502                             |
| Length (cm) <sup>b</sup>               | All                     | 745 | 0.19 (0.00, 0.39) <sup>d</sup>    | 0.24 (0.02, 0.47) <sup>d</sup>    | 0.23 (0.00, 0.47)                 |
|                                        | Poor                    | 458 | 0.26 (0.02, 0.50) <sup>d</sup>    | 0.32 (0.04, 0.60) <sup>d</sup>    | 0.30 (0.01, 0.59) <sup>d</sup>    |
|                                        | Not Poor                | 287 | 0.08 (-0.22, 0.38)                | 0.09 (-0.30, 0.47)                | 0.10 (-0.31, 0.50)                |
|                                        | <i>p</i> <sub>int</sub> |     | 0.362                             | 0.332                             | 0.425                             |
| Head circumference (cm) <sup>b</sup>   | All                     | 745 | 0.11 (-0.02, 0.23)                | 0.06 (-0.09, 0.21)                | 0.12 (-0.03, 0.27)                |
|                                        | Poor                    | 458 | 0.11 (-0.04, 0.27)                | 0.07 (-0.11, 0.26)                | 0.10 (-0.09, 0.29)                |
|                                        | Not Poor                | 287 | 0.10 (-0.10, 0.30)                | 0.03 (-0.22, 0.28)                | 0.16 (-0.10, 0.43)                |
|                                        | <i>p</i> <sub>int</sub> |     | 0.925                             | 0.795                             | 0.701                             |
| Gestational age (weeks) <sup>b</sup>   | All                     | 751 | 0.01 (-0.19, 0.22)                | -0.07 (-0.31, 0.17)               | 0.00 (-0.25, 0.25)                |
|                                        | Poor                    | 460 | 0.05 (-0.21, 0.31)                | -0.06 (-0.36, 0.24)               | 0.00 (-0.30, 0.31)                |
|                                        | Not Poor                | 291 | -0.05 (-0.37, 0.28)               | -0.09 (-0.50, 0.33)               | 0.00 (-0.44, 0.43)                |
|                                        | <i>p</i> <sub>int</sub> |     | 0.647                             | 0.911                             | 0.976                             |
| Low birth weight <sup>c</sup>          | All                     | 750 | 0.82 (0.61, 1.10)                 | 0.74 (0.50, 1.09)                 | 0.87 (0.58, 1.31)                 |
|                                        | Poor                    | 459 | 0.75 (0.51, 1.09)                 | 0.65 (0.41, 1.04)                 | 0.82 (0.51, 1.32)                 |
|                                        | Not Poor                | 291 | 0.95 (0.59, 1.54)                 | 0.98 (0.53, 1.82)                 | 1.02 (0.48, 2.13)                 |
|                                        | <i>p</i> <sub>int</sub> |     | 0.416                             | 0.285                             | 0.631                             |
| Preterm birth <sup>c</sup>             | All                     | 751 | 0.98 (0.76, 1.25)                 | 1.01 (0.75, 1.36)                 | 1.07 (0.79, 1.45)                 |
|                                        | Poor                    | 460 | 0.98 (0.71, 1.35)                 | 0.96 (0.67, 1.38)                 | 1.08 (0.73, 1.58)                 |
|                                        | Not Poor                | 291 | 0.99 (0.68, 1.43)                 | 1.11 (0.68, 1.81)                 | 1.07 (0.66, 1.74)                 |
|                                        | <i>p</i> <sub>int</sub> |     | 0.959                             | 0.631                             | 0.989                             |
| Small for gestational age <sup>c</sup> | All                     | 750 | 0.95 (0.77, 1.17)                 | 0.88 (0.67, 1.14)                 | 0.93 (0.71, 1.21)                 |
|                                        | Poor                    | 459 | 0.87 (0.67, 1.14)                 | 0.76 (0.55, 1.04)                 | 0.92 (0.67, 1.26)                 |
|                                        | Not Poor                | 291 | 1.06 (0.74, 1.52)                 | 1.20 (0.77, 1.87)                 | 0.90 (0.54, 1.48)                 |
|                                        | <i>p</i> <sub>int</sub> |     | 0.388                             | 0.098                             | 0.930                             |
| Large for gestational age <sup>c</sup> | All                     | 750 | 1.09 (0.71, 1.66)                 | 1.24 (0.79, 1.95)                 | 1.07 (0.63, 1.82)                 |
|                                        | Poor                    | 459 | 1.35 (0.74, 2.47)                 | 1.40 (0.77, 2.55)                 | 1.23 (0.62, 2.44)                 |
|                                        | Not Poor                | 291 | 0.74 (0.40, 1.35)                 | 0.94 (0.47, 1.91)                 | 0.77 (0.35, 1.66)                 |
|                                        | <i>p</i> <sub>int</sub> |     | 0.169                             | 0.403                             | 0.363                             |

<sup>a</sup> Models adjusted for maternal age, education, marital status, smoking, alcohol use during pregnancy, post-delivery BMI, and HIV status; household income per capita and assets; child sex, parity, delivery method, and season of birth.

<sup>b</sup> Coefficients show the change in mean outcome for each 10-fold increase in maternal peripartum serum DDT/E concentration.

<sup>c</sup> Coefficients show the odd ratio for each 10-fold increase in maternal peripartum serum DDT/E concentration.

<sup>d</sup>  $P < 0.05$ .

**Web Table 12.** Interactions by household poverty status for associations between maternal peripartum urinary pyrethroid metabolite concentrations and birth outcomes in VHEMBE study participants based on standard multivariable regression models<sup>a</sup>

|                                        |                         |     | <i>cis</i> -DBCA     | <i>cis</i> -DCCA               | <i>trans</i> -DCCA   | 3-PBA                 |
|----------------------------------------|-------------------------|-----|----------------------|--------------------------------|----------------------|-----------------------|
|                                        |                         | N   | β/OR (95% CI)        | β/OR (95% CI)                  | β/OR (95% CI)        | β/OR (95% CI)         |
| Birth weight (g) <sup>b</sup>          | All                     | 738 | 18.2 (-41.0, 77.4)   | -9.6 (-77.6, 58.4)             | -5.3 (-64.6, 53.9)   | 5.3 (-66.2, 76.8)     |
|                                        | Poor                    | 450 | 38.5 (-35.5, 112.6)  | 13.9 (-72.0, 99.8)             | 21.0 (-51.5, 93.5)   | 14.1 (-74.0, 102.2)   |
|                                        | Not Poor                | 288 | -16.2 (-114.8, 82.5) | -49.2 (-158.8, 60.3)           | -59.0 (-160.6, 42.7) | -12.1 (-132.6, 108.4) |
|                                        | <i>p</i> <sub>int</sub> |     | 0.384                | 0.370                          | 0.207                | 0.728                 |
| Length (cm) <sup>b</sup>               | All                     | 733 | 0.11 (-0.18, 0.41)   | 0.04 (-0.30, 0.38)             | 0.02 (-0.28, 0.31)   | 0.15 (-0.20, 0.51)    |
|                                        | Poor                    | 449 | 0.19 (-0.18, 0.56)   | 0.10 (-0.33, 0.52)             | 0.10 (-0.26, 0.47)   | 0.18 (-0.26, 0.62)    |
|                                        | Not Poor                | 284 | 0.00 (-0.50, 0.50)   | -0.05 (-0.60, 0.50)            | -0.17 (-0.68, 0.34)  | 0.09 (-0.51, 0.69)    |
|                                        | <i>p</i> <sub>int</sub> |     | 0.560                | 0.680                          | 0.395                | 0.804                 |
| Head circumference (cm) <sup>b</sup>   | All                     | 733 | 0.07 (-0.12, 0.27)   | 0.01 (-0.21, 0.23)             | -0.02 (-0.21, 0.18)  | -0.02 (-0.26, 0.21)   |
|                                        | Poor                    | 449 | 0.18 (-0.06, 0.42)   | 0.06 (-0.21, 0.34)             | 0.03 (-0.20, 0.27)   | 0.05 (-0.24, 0.33)    |
|                                        | Not Poor                | 284 | -0.13 (-0.45, 0.20)  | -0.08 (-0.43, 0.28)            | -0.11 (-0.44, 0.23)  | -0.16 (-0.55, 0.23)   |
|                                        | <i>p</i> <sub>int</sub> |     | 0.131                | 0.539                          | 0.506                | 0.390                 |
| Gestational age (weeks) <sup>b</sup>   | All                     | 738 | 0.06 (-0.26, 0.37)   | 0.06 (-0.31, 0.42)             | 0.02 (-0.30, 0.34)   | -0.03 (-0.41, 0.35)   |
|                                        | Poor                    | 450 | 0.04 (-0.35, 0.44)   | 0.09 (-0.37, 0.54)             | 0.01 (-0.37, 0.40)   | 0.06 (-0.41, 0.53)    |
|                                        | Not Poor                | 288 | 0.09 (-0.44, 0.61)   | 0.00 (-0.58, 0.59)             | 0.03 (-0.51, 0.58)   | -0.19 (-0.83, 0.45)   |
|                                        | <i>p</i> <sub>int</sub> |     | 0.899                | 0.823                          | 0.948                | 0.534                 |
| Low birth weight <sup>c</sup>          | All                     | 738 | 0.79 (0.48, 1.30)    | 0.74 (0.47, 1.18)              | 0.83 (0.55, 1.25)    | 0.68 (0.41, 1.15)     |
|                                        | Poor                    | 450 | 0.79 (0.45, 1.37)    | 0.86 (0.49, 1.49)              | 0.83 (0.52, 1.32)    | 0.77 (0.42, 1.40)     |
|                                        | Not Poor                | 288 | 0.81 (0.28, 2.33)    | 0.47 (0.22, 1.00) <sup>d</sup> | 0.79 (0.35, 1.82)    | 0.46 (0.19, 1.15)     |
|                                        | <i>p</i> <sub>int</sub> |     | 0.966                | 0.205                          | 0.922                | 0.357                 |
| Preterm birth <sup>c</sup>             | All                     | 738 | 0.98 (0.67, 1.44)    | 0.87 (0.59, 1.28)              | 1.01 (0.72, 1.41)    | 1.03 (0.68, 1.55)     |
|                                        | Poor                    | 450 | 0.92 (0.56, 1.52)    | 0.85 (0.51, 1.41)              | 1.08 (0.70, 1.67)    | 0.99 (0.58, 1.69)     |
|                                        | Not Poor                | 288 | 1.08 (0.60, 1.97)    | 0.91 (0.50, 1.65)              | 0.89 (0.50, 1.56)    | 1.12 (0.60, 2.07)     |
|                                        | <i>p</i> <sub>int</sub> |     | 0.681                | 0.864                          | 0.577                | 0.767                 |
| Small for gestational age <sup>c</sup> | All                     | 738 | 1.03 (0.74, 1.44)    | 0.97 (0.68, 1.39)              | 1.02 (0.75, 1.39)    | 1.04 (0.72, 1.52)     |
|                                        | Poor                    | 450 | 0.91 (0.62, 1.35)    | 0.92 (0.59, 1.43)              | 0.96 (0.66, 1.39)    | 1.08 (0.69, 1.68)     |
|                                        | Not Poor                | 288 | 1.44 (0.74, 2.80)    | 1.03 (0.56, 1.90)              | 1.12 (0.63, 2.00)    | 0.95 (0.48, 1.87)     |
|                                        | <i>p</i> <sub>int</sub> |     | 0.250                | 0.758                          | 0.657                | 0.761                 |
| Large for gestational age <sup>c</sup> | All                     | 738 | 0.70 (0.38, 1.28)    | 0.93 (0.48, 1.81)              | 0.96 (0.53, 1.76)    | 0.94 (0.46, 1.95)     |
|                                        | Poor                    | 450 | 0.60 (0.26, 1.38)    | 0.64 (0.30, 1.39)              | 0.91 (0.47, 1.76)    | 0.75 (0.35, 1.57)     |
|                                        | Not Poor                | 288 | 0.89 (0.39, 2.00)    | 1.62 (0.58, 4.48)              | 1.07 (0.33, 3.47)    | 1.45 (0.36, 5.76)     |
|                                        | <i>p</i> <sub>int</sub> |     | 0.502                | 0.157                          | 0.816                | 0.397                 |

<sup>a</sup> Models adjusted for maternal age, education, marital status, smoking, alcohol use during pregnancy, post-delivery BMI, and HIV status; household income per capita and assets; child sex, parity, delivery method, and season of birth.

<sup>b</sup> Coefficients show the change in mean outcome for each 10-fold increase in maternal peripartum pyrethroid metabolite concentration.

<sup>c</sup> Coefficients show the odd ratio for each 10-fold increase in maternal peripartum pyrethroid metabolite concentration.

<sup>d</sup>  $P < 0.05$ .

**Web Table 13.** Interactions by household poverty status for associations between maternal peripartum serum DDT/E concentrations and birth outcomes in VHEMBE study participants based on propensity score models<sup>a</sup>

|                                        |           | N   | $p, p^l$ -DDT<br>$\beta$ /OR (95% CI) | $p, p^l$ -DDE<br>$\beta$ /OR (95% CI) | $o, p^l$ -DDT<br>$\beta$ /OR (95% CI) |
|----------------------------------------|-----------|-----|---------------------------------------|---------------------------------------|---------------------------------------|
| Birth weight (g) <sup>b</sup>          | All       | 750 | 15.8 (-24.0, 55.6)                    | 11.6 (-36.8, 60.0)                    | 12.6 (-37.5, 62.6)                    |
|                                        | Poor      | 459 | 36.7 (-14.6, 87.9)                    | 41.5 (-17.5, 100.5)                   | 21.5 (-39.9, 82.8)                    |
|                                        | Not Poor  | 291 | -13.2 (-76.1, 49.7)                   | -46.6 (-128.5, 35.3)                  | -3.3 (-88.3, 81.7)                    |
|                                        | $p_{int}$ |     | 0.226                                 | 0.084                                 | 0.640                                 |
| Length (cm) <sup>b</sup>               | All       | 745 | 0.20 (0.00, 0.39)                     | 0.21 (-0.03, 0.45)                    | 0.22 (-0.03, 0.47)                    |
|                                        | Poor      | 458 | 0.21 (-0.04, 0.46)                    | 0.23 (-0.06, 0.52)                    | 0.25 (-0.05, 0.56)                    |
|                                        | Not Poor  | 287 | 0.17 (-0.14, 0.48)                    | 0.17 (-0.24, 0.57)                    | 0.14 (-0.28, 0.56)                    |
|                                        | $p_{int}$ |     | 0.851                                 | 0.808                                 | 0.665                                 |
| Head circumference (cm) <sup>b</sup>   | All       | 745 | 0.10 (-0.04, 0.23)                    | 0.02 (-0.14, 0.18)                    | 0.09 (-0.08, 0.26)                    |
|                                        | Poor      | 458 | 0.07 (-0.10, 0.24)                    | -0.01 (-0.20, 0.19)                   | 0.05 (-0.15, 0.25)                    |
|                                        | Not Poor  | 287 | 0.14 (-0.07, 0.35)                    | 0.07 (-0.21, 0.34)                    | 0.16 (-0.12, 0.45)                    |
|                                        | $p_{int}$ |     | 0.621                                 | 0.657                                 | 0.515                                 |
| Gestational age (weeks) <sup>b</sup>   | All       | 751 | 0.03 (-0.18, 0.23)                    | -0.08 (-0.33, 0.17)                   | 0.00 (-0.26, 0.26)                    |
|                                        | Poor      | 460 | 0.03 (-0.24, 0.29)                    | -0.12 (-0.42, 0.19)                   | -0.04 (-0.35, 0.27)                   |
|                                        | Not Poor  | 291 | 0.04 (-0.29, 0.36)                    | -0.02 (-0.44, 0.40)                   | 0.08 (-0.36, 0.51)                    |
|                                        | $p_{int}$ |     | 0.961                                 | 0.703                                 | 0.660                                 |
| Low birth weight <sup>c</sup>          | All       | 750 | 0.84 (0.60, 1.20)                     | 0.77 (0.52, 1.13)                     | 0.90 (0.60, 1.34)                     |
|                                        | Poor      | 459 | 0.80 (0.53, 1.23)                     | 0.70 (0.44, 1.11)                     | 0.86 (0.54, 1.37)                     |
|                                        | Not Poor  | 291 | 0.88 (0.47, 1.65)                     | 0.98 (0.47, 2.03)                     | 0.98 (0.45, 2.11)                     |
|                                        | $p_{int}$ |     | 0.809                                 | 0.451                                 | 0.777                                 |
| Preterm birth <sup>c</sup>             | All       | 751 | 0.96 (0.74, 1.24)                     | 1.06 (0.77, 1.44)                     | 1.08 (0.77, 1.52)                     |
|                                        | Poor      | 460 | 1.00 (0.72, 1.40)                     | 1.03 (0.70, 1.52)                     | 1.14 (0.75, 1.74)                     |
|                                        | Not Poor  | 291 | 0.91 (0.61, 1.35)                     | 1.10 (0.66, 1.84)                     | 0.99 (0.57, 1.74)                     |
|                                        | $p_{int}$ |     | 0.709                                 | 0.855                                 | 0.687                                 |
| Small for gestational age <sup>c</sup> | All       | 750 | 0.93 (0.75, 1.14)                     | 0.85 (0.67, 1.08)                     | 0.90 (0.70, 1.16)                     |
|                                        | Poor      | 459 | 0.85 (0.66, 1.09)                     | 0.72 (0.54, 0.97) <sup>d</sup>        | 0.89 (0.66, 1.20)                     |
|                                        | Not Poor  | 291 | 1.04 (0.73, 1.47)                     | 1.23 (0.79, 1.92)                     | 0.88 (0.55, 1.42)                     |
|                                        | $p_{int}$ |     | 0.362                                 | 0.049                                 | 0.983                                 |
| Large for gestational age <sup>c</sup> | All       | 750 | 1.01 (0.71, 1.45)                     | 1.20 (0.73, 1.96)                     | 0.96 (0.60, 1.52)                     |
|                                        | Poor      | 459 | 1.29 (0.78, 2.12)                     | 1.44 (0.77, 2.70)                     | 1.19 (0.66, 2.14)                     |
|                                        | Not Poor  | 291 | 0.71 (0.38, 1.30)                     | 0.86 (0.38, 1.95)                     | 0.63 (0.27, 1.45)                     |
|                                        | $p_{int}$ |     | 0.147                                 | 0.316                                 | 0.226                                 |

<sup>a</sup> Propensity scores and inverse probability of treatment weights were based on conditional probability density functions determined using the Super Learner algorithm.

<sup>b</sup> Coefficients show the change in mean outcome for each 10-fold increase in maternal peripartum serum DDT/E or pyrethroid metabolite concentration.

<sup>c</sup> Coefficients show the odd ratio for each 10-fold increase in maternal peripartum serum DDT/E concentration.

<sup>d</sup>  $P < 0.05$ .

**Web Table 14.** Interactions by household poverty status for associations between maternal peripartum urinary pyrethroid metabolite concentrations and birth outcomes in VHEMBE study participants based on propensity score models<sup>a</sup>

|                                        |                  | N   | <i>cis</i> -DBCA<br>β/OR (95% CI) | <i>cis</i> -DCCA<br>β/OR (95% CI) | <i>trans</i> -DCCA<br>β/OR (95% CI) | 3-PBA<br>β/OR (95% CI) |
|----------------------------------------|------------------|-----|-----------------------------------|-----------------------------------|-------------------------------------|------------------------|
| Birth weight (g) <sup>b</sup>          | All              | 738 | 24.4 (-38.3, 87.2)                | 4.0 (-67.3, 75.2)                 | -5.0 (-67.9, 57.8)                  | 19.9 (-54.0, 93.8)     |
|                                        | Poor             | 450 | 39.0 (-40.1, 118.2)               | 14.9 (-75.6, 105.5)               | 9.2 (-68.0, 86.3)                   | 17.0 (-75.1, 109.1)    |
|                                        | Not Poor         | 288 | -1.8 (-105.6, 102.0)              | -14.2 (-128.3, 99.9)              | -32.9 (-139.0, 73.2)                | 24.2 (-100.2, 148.6)   |
|                                        | p <sub>int</sub> |     | 0.540                             | 0.693                             | 0.526                               | 0.927                  |
| Length (cm) <sup>b</sup>               | All              | 733 | 0.04 (-0.27, 0.36)                | 0.02 (-0.33, 0.38)                | -0.05 (-0.36, 0.26)                 | 0.13 (-0.23, 0.50)     |
|                                        | Poor             | 449 | 0.07 (-0.32, 0.46)                | 0.01 (-0.44, 0.46)                | -0.03 (-0.41, 0.35)                 | 0.08 (-0.37, 0.53)     |
|                                        | Not Poor         | 284 | 0.01 (-0.51, 0.53)                | 0.05 (-0.51, 0.62)                | -0.10 (-0.62, 0.43)                 | 0.23 (-0.38, 0.84)     |
|                                        | p <sub>int</sub> |     | 0.856                             | 0.909                             | 0.833                               | 0.703                  |
| Head circumference (cm) <sup>b</sup>   | All              | 733 | 0.02 (-0.19, 0.23)                | -0.02 (-0.25, 0.22)               | -0.07 (-0.28, 0.13)                 | -0.03 (-0.27, 0.21)    |
|                                        | Poor             | 449 | 0.12 (-0.14, 0.38)                | 0.00 (-0.30, 0.30)                | -0.07 (-0.32, 0.19)                 | 0.00 (-0.31, 0.30)     |
|                                        | Not Poor         | 284 | -0.15 (-0.49, 0.20)               | -0.05 (-0.42, 0.33)               | -0.09 (-0.44, 0.26)                 | -0.08 (-0.49, 0.33)    |
|                                        | p <sub>int</sub> |     | 0.232                             | 0.833                             | 0.922                               | 0.765                  |
| Gestational age (weeks) <sup>b</sup>   | All              | 738 | -0.04 (-0.36, 0.28)               | 0.13 (-0.24, 0.49)                | 0.06 (-0.26, 0.38)                  | 0.00 (-0.38, 0.37)     |
|                                        | Poor             | 450 | -0.09 (-0.49, 0.32)               | 0.13 (-0.34, 0.59)                | 0.01 (-0.38, 0.40)                  | 0.04 (-0.43, 0.51)     |
|                                        | Not Poor         | 288 | 0.02 (-0.51, 0.55)                | 0.13 (-0.46, 0.71)                | 0.15 (-0.39, 0.69)                  | -0.09 (-0.72, 0.55)    |
|                                        | p <sub>int</sub> |     | 0.749                             | 0.997                             | 0.671                               | 0.739                  |
| Low birth weight <sup>c</sup>          | All              | 738 | 0.75 (0.45, 1.26)                 | 0.63 (0.30, 1.30)                 | 0.80 (0.43, 1.48)                   | 0.62 (0.32, 1.22)      |
|                                        | Poor             | 450 | 0.75 (0.41, 1.38)                 | 0.88 (0.38, 2.07)                 | 0.90 (0.44, 1.86)                   | 0.78 (0.36, 1.72)      |
|                                        | Not Poor         | 288 | 0.77 (0.30, 2.00)                 | 0.27 (0.06, 1.10)                 | 0.60 (0.18, 2.02)                   | 0.32 (0.08, 1.23)      |
|                                        | p <sub>int</sub> |     | 0.960                             | 0.153                             | 0.568                               | 0.256                  |
| Preterm birth <sup>c</sup>             | All              | 738 | 1.07 (0.69, 1.66)                 | 0.82 (0.50, 1.36)                 | 1.01 (0.65, 1.58)                   | 1.03 (0.62, 1.73)      |
|                                        | Poor             | 450 | 1.03 (0.58, 1.81)                 | 0.82 (0.43, 1.56)                 | 1.15 (0.66, 2.00)                   | 1.01 (0.53, 1.92)      |
|                                        | Not Poor         | 288 | 1.13 (0.56, 2.27)                 | 0.83 (0.38, 1.83)                 | 0.81 (0.39, 1.70)                   | 1.07 (0.46, 2.49)      |
|                                        | p <sub>int</sub> |     | 0.843                             | 0.979                             | 0.466                               | 0.916                  |
| Small for gestational age <sup>c</sup> | All              | 738 | 1.01 (0.74, 1.38)                 | 1.02 (0.70, 1.49)                 | 1.09 (0.78, 1.51)                   | 1.09 (0.74, 1.61)      |
|                                        | Poor             | 450 | 0.90 (0.62, 1.33)                 | 1.00 (0.63, 1.59)                 | 1.04 (0.70, 1.53)                   | 1.13 (0.71, 1.82)      |
|                                        | Not Poor         | 288 | 1.37 (0.78, 2.42)                 | 1.09 (0.56, 2.13)                 | 1.26 (0.69, 2.30)                   | 1.04 (0.50, 2.13)      |
|                                        | p <sub>int</sub> |     | 0.230                             | 0.825                             | 0.590                               | 0.836                  |
| Large for gestational age <sup>c</sup> | All              | 733 | 0.83 (0.43, 1.60)                 | 0.86 (0.43, 1.72)                 | 0.90 (0.50, 1.64)                   | 0.97 (0.49, 1.94)      |
|                                        | Poor             | 449 | 0.74 (0.32, 1.72)                 | 0.56 (0.22, 1.45)                 | 0.84 (0.40, 1.76)                   | 0.78 (0.32, 1.86)      |
|                                        | Not Poor         | 284 | 1.01 (0.35, 2.94)                 | 1.52 (0.53, 4.33)                 | 1.03 (0.39, 2.70)                   | 1.43 (0.46, 4.44)      |
|                                        | p <sub>int</sub> |     | 0.649                             | 0.172                             | 0.745                               | 0.407                  |



<sup>a</sup> Propensity scores and inverse probability of treatment weights were based on conditional probability density functions determined using the Super Learner algorithm.

<sup>b</sup> Coefficients show the change in mean outcome for each 10-fold increase in maternal peripartum pyrethroid metabolite concentration.

<sup>c</sup> Coefficients show the odd ratio for each 10-fold increase in maternal peripartum pyrethroid metabolite concentration.

<sup>d</sup>  $P < 0.05$ .

**Web Table 15.** Interactions by maternal HIV status for associations between maternal peripartum serum DDT/E concentrations and birth outcomes in VHEMBE study participants based on marginal structural models<sup>a</sup>

|                                        |           | N   | $p, p'$ -DDT<br>β/OR (95% CI) | $p, p'$ -DDE<br>β/OR (95% CI)  | $o, p'$ -DDT<br>β/OR (95% CI) |
|----------------------------------------|-----------|-----|-------------------------------|--------------------------------|-------------------------------|
| Birth weight (g) <sup>b</sup>          | All       | 750 | 12.2 (-24.5, 49.7)            | 10.5 (-36.9, 58.1)             | 11.4 (-36.0, 60.6)            |
|                                        | HIV pos   | 646 | 102.7 (-29.7, 250.2)          | 86.9 (-64.1, 245.3)            | 51.8 (-118.0, 221.3)          |
|                                        | HIV neg   | 104 | 0.9 (-40.0, 39.2)             | -1.2 (-50.9, 47.4)             | 1.7 (-46.3, 52.5)             |
|                                        | $p_{int}$ |     | 0.146                         | 0.298                          | 0.598                         |
| Length (cm) <sup>b</sup>               | All       | 745 | 0.16 (-0.04, 0.36)            | 0.20 (-0.04, 0.44)             | 0.20 (-0.05, 0.45)            |
|                                        | HIV pos   | 103 | 0.43 (-0.23, 1.21)            | 0.43 (-0.36, 1.30)             | 0.19 (-0.58, 0.96)            |
|                                        | HIV neg   | 642 | 0.13 (-0.06, 0.33)            | 0.17 (-0.06, 0.40)             | 0.18 (-0.06, 0.43)            |
|                                        | $p_{int}$ |     | 0.430                         | 0.556                          | 0.972                         |
| Head circumference (cm) <sup>b</sup>   | All       | 745 | 0.07 (-0.05, 0.19)            | 0.02 (-0.12, 0.16)             | 0.09 (-0.05, 0.24)            |
|                                        | HIV pos   | 103 | 0.28 (-0.04, 0.69)            | 0.14 (-0.25, 0.59)             | 0.18 (-0.19, 0.60)            |
|                                        | HIV neg   | 642 | 0.04 (-0.08, 0.17)            | -0.01 (-0.15, 0.15)            | 0.06 (-0.09, 0.23)            |
|                                        | $p_{int}$ |     | 0.196                         | 0.516                          | 0.554                         |
| Gestational age (weeks) <sup>b</sup>   | All       | 751 | -0.02 (-0.21, 0.18)           | -0.08 (-0.34, 0.15)            | -0.04 (-0.29, 0.20)           |
|                                        | HIV pos   | 104 | -0.01 (-0.79, 0.84)           | -0.15 (-1.16, 0.66)            | -0.14 (-0.88, 0.70)           |
|                                        | HIV neg   | 647 | -0.01 (-0.21, 0.19)           | -0.07 (-0.32, 0.17)            | -0.02 (-0.29, 0.22)           |
|                                        | $p_{int}$ |     | 0.942                         | 0.840                          | 0.792                         |
| Low birth weight <sup>c</sup>          | All       | 750 | 0.81 (0.60, 1.08)             | 0.78 (0.53, 1.16)              | 0.90 (0.62, 1.32)             |
|                                        | HIV pos   | 646 | 0.69 (0.25, 1.40)             | 0.75 (0.32, 1.50)              | 0.88 (0.32, 2.09)             |
|                                        | HIV neg   | 104 | 0.84 (0.60, 1.14)             | 0.80 (0.51, 1.28)              | 0.92 (0.61, 1.40)             |
|                                        | $p_{int}$ |     | 0.584                         | 0.840                          | 0.966                         |
| Preterm birth <sup>c</sup>             | All       | 751 | 0.97 (0.74, 1.27)             | 1.04 (0.75, 1.41)              | 1.06 (0.77, 1.48)             |
|                                        | HIV pos   | 104 | 1.26 (0.51, 2.78)             | 1.22 (0.46, 3.25)              | 1.67 (0.73, 3.77)             |
|                                        | HIV neg   | 647 | 0.92 (0.68, 1.20)             | 1.00 (0.72, 1.39)              | 0.95 (0.67, 1.35)             |
|                                        | $p_{int}$ |     | 0.456                         | 0.658                          | 0.222                         |
| Small for gestational age <sup>c</sup> | All       | 750 | 0.92 (0.73, 1.16)             | 0.87 (0.66, 1.10)              | 0.89 (0.68, 1.16)             |
|                                        | HIV pos   | 646 | 0.66 (0.38, 1.14)             | 0.50 (0.22, 0.96) <sup>d</sup> | 0.72 (0.33, 1.40)             |
|                                        | HIV neg   | 104 | 0.98 (0.75, 1.28)             | 0.95 (0.71, 1.25)              | 0.95 (0.71, 1.28)             |
|                                        | $p_{int}$ |     | 0.186                         | 0.080                          | 0.466                         |
| Large for gestational age <sup>c</sup> | All       | 750 | 1.02 (0.69, 1.51)             | 1.13 (0.72, 1.80)              | 0.94 (0.54, 1.57)             |
|                                        | HIV pos   | 646 | 1.94 (0.86, 4.76)             | 2.11 (0.55, 7.37)              | 1.29 (0.10, 5.29)             |
|                                        | HIV neg   | 104 | 0.94 (0.60, 1.46)             | 1.02 (0.63, 1.70)              | 0.89 (0.50, 1.53)             |
|                                        | $p_{int}$ |     | 0.122                         | 0.256                          | 0.712                         |

<sup>a</sup> Propensity scores and inverse probability of treatment weights were based on conditional probability density functions determined using the Super Learner algorithm.

<sup>b</sup> Coefficients show the change in mean outcome for each 10-fold increase in maternal peripartum serum DDT/E concentration.

<sup>c</sup> Coefficients show the odd ratio for each 10-fold increase in maternal peripartum serum DDT/E concentration.

<sup>d</sup>  $P < 0.05$ .

**Web Table 16.** Interactions by maternal HIV status for associations between maternal peripartum urinary pyrethroid metabolite concentrations and birth outcomes in VHEMBE study participants based on marginal structural models<sup>a</sup>

|                                        |                  |     | <i>cis</i> -DBCA               | <i>cis</i> -DCCA     | <i>trans</i> -DCCA   | 3-PBA                          |
|----------------------------------------|------------------|-----|--------------------------------|----------------------|----------------------|--------------------------------|
|                                        |                  | N   | β/OR (95% CI)                  | β/OR (95% CI)        | β/OR (95% CI)        | β/OR (95% CI)                  |
| Birth weight (g) <sup>b</sup>          | All              | 738 | 4.8 (-65.4, 79.8)              | 15.8 (-52.9, 83.4)   | 5.2 (-57.0, 65.1)    | 7.5 (-83.3, 99.8)              |
|                                        | HIV pos          | 97  | 176.6 (-22.7, 360.1)           | 49.1 (-155.9, 227.0) | 14.7 (-159.4, 167.5) | 2.5 (-188.2, 201.0)            |
|                                        | HIV neg          | 641 | -25.8 (-103.0, 50.8)           | 14.8 (-57.5, 86.7)   | 9.5 (-53.8, 73.9)    | 6.4 (-88.2, 98.5)              |
|                                        | p <sub>int</sub> |     | 0.064                          | 0.756                | 0.972                | 0.970                          |
| Length (cm) <sup>b</sup>               | All              | 733 | 0.03 (-0.26, 0.33)             | 0.11 (-0.18, 0.37)   | 0.02 (-0.24, 0.26)   | 0.12 (-0.20, 0.45)             |
|                                        | HIV pos          | 96  | 0.34 (-0.34, 1.37)             | 0.52 (-0.31, 1.27)   | 0.33 (-0.41, 0.88)   | 0.44 (-0.17, 1.17)             |
|                                        | HIV neg          | 637 | -0.03 (-0.34, 0.30)            | 0.06 (-0.28, 0.36)   | 0.00 (-0.31, 0.26)   | 0.09 (-0.28, 0.48)             |
|                                        | p <sub>int</sub> |     | 0.382                          | 0.262                | 0.372                | 0.390                          |
| Head circumference (cm) <sup>b</sup>   | All              | 733 | 0.04 (-0.20, 0.27)             | 0.06 (-0.20, 0.28)   | -0.02 (-0.25, 0.18)  | -0.01 (-0.30, 0.27)            |
|                                        | HIV pos          | 96  | 0.52 (0.00, 1.15) <sup>d</sup> | 0.25 (-0.34, 0.70)   | 0.16 (-0.38, 0.57)   | 0.25 (-0.29, 0.72)             |
|                                        | HIV neg          | 637 | -0.04 (-0.28, 0.21)            | 0.05 (-0.24, 0.29)   | -0.02 (-0.29, 0.20)  | -0.04 (-0.37, 0.27)            |
|                                        | p <sub>int</sub> |     | 0.070                          | 0.506                | 0.464                | 0.320                          |
| Gestational age (weeks) <sup>b</sup>   | All              | 738 | -0.11 (-0.49, 0.27)            | 0.07 (-0.26, 0.39)   | 0.01 (-0.27, 0.29)   | -0.11 (-0.56, 0.29)            |
|                                        | HIV pos          | 97  | 0.51 (-0.53, 1.52)             | 0.49 (-0.50, 1.72)   | 0.38 (-0.51, 1.46)   | 0.15 (-1.05, 1.47)             |
|                                        | HIV neg          | 641 | -0.22 (-0.66, 0.22)            | 0.00 (-0.37, 0.33)   | -0.05 (-0.36, 0.22)  | -0.22 (-0.66, 0.21)            |
|                                        | p <sub>int</sub> |     | 0.196                          | 0.380                | 0.346                | 0.518                          |
| Low birth weight <sup>c</sup>          | All              | 738 | 0.97 (0.45, 2.01)              | 0.70 (0.41, 1.12)    | 0.81 (0.51, 1.22)    | 0.73 (0.36, 1.56)              |
|                                        | HIV pos          | 97  | 0.36 (0.06, 0.99) <sup>d</sup> | 0.40 (0.11, 1.13)    | 0.51 (0.17, 1.26)    | 0.37 (0.12, 0.94) <sup>d</sup> |
|                                        | HIV neg          | 641 | 1.29 (0.56, 2.70)              | 0.78 (0.43, 1.29)    | 0.90 (0.53, 1.37)    | 0.91 (0.43, 2.30)              |
|                                        | p <sub>int</sub> |     | 0.070                          | 0.278                | 0.256                | 0.190                          |
| Preterm birth <sup>c</sup>             | All              | 738 | 1.11 (0.69, 1.82)              | 0.83 (0.52, 1.27)    | 0.98 (0.67, 1.44)    | 1.12 (0.66, 1.99)              |
|                                        | HIV pos          | 97  | 0.64 (0.26, 1.39)              | 0.89 (0.20, 3.05)    | 0.99 (0.32, 2.66)    | 1.17 (0.21, 4.19)              |
|                                        | HIV neg          | 641 | 1.28 (0.72, 2.16)              | 0.82 (0.53, 1.29)    | 0.99 (0.68, 1.43)    | 1.21 (0.69, 2.17)              |
|                                        | p <sub>int</sub> |     | 0.178                          | 0.952                | 0.990                | 0.866                          |
| Small for gestational age <sup>c</sup> | All              | 738 | 0.97 (0.70, 1.33)              | 0.91 (0.65, 1.32)    | 0.99 (0.72, 1.36)    | 1.01 (0.71, 1.49)              |
|                                        | HIV pos          | 97  | 0.93 (0.38, 2.21)              | 1.38 (0.66, 5.35)    | 1.25 (0.66, 3.70)    | 1.01 (0.47, 3.79)              |
|                                        | HIV neg          | 641 | 0.98 (0.71, 1.40)              | 0.80 (0.53, 1.22)    | 0.90 (0.63, 1.27)    | 0.89 (0.59, 1.37)              |
|                                        | p <sub>int</sub> |     | 0.872                          | 0.188                | 0.424                | 0.744                          |
| Large for gestational age <sup>c</sup> | All              | 738 | 0.78 (0.47, 1.34)              | 0.91 (0.45, 1.70)    | 0.91 (0.49, 1.61)    | 0.88 (0.39, 1.84)              |
|                                        | HIV pos          | 97  | 0.56 (0.17, 1.75)              | 0.33 (0.02, 1.91)    | 0.27 (0.03, 1.12)    | 0.27 (0.04, 1.08)              |
|                                        | HIV neg          | 641 | 0.84 (0.46, 1.53)              | 1.06 (0.48, 2.13)    | 1.16 (0.63, 2.14)    | 1.16 (0.52, 2.51)              |
|                                        | p <sub>int</sub> |     | 0.478                          | 0.200                | 0.076                | 0.094                          |

<sup>a</sup> Propensity scores and inverse probability of treatment weights were based on conditional probability density functions determined using the Super Learner algorithm.

<sup>b</sup> Coefficients show the change in mean outcome for each 10-fold increase in maternal peripartum pyrethroid metabolite concentration.

<sup>c</sup> Coefficients show the odd ratio for each 10-fold increase in maternal peripartum pyrethroid metabolite concentration.

<sup>d</sup>  $P < 0.05$ .

**Web Table 17.** Interactions by maternal HIV status for associations between maternal peripartum serum DDT/E concentrations and birth outcomes in VHEMBE study participants based on standard multivariable regression models<sup>a</sup>

|                                        |                     | N   | $\rho, \rho'$ -DDT<br>$\beta$ /OR (95% CI) | $\rho, \rho'$ -DDE<br>$\beta$ /OR (95% CI) | $\rho, \rho'$ -DDT<br>$\beta$ /OR (95% CI) |
|----------------------------------------|---------------------|-----|--------------------------------------------|--------------------------------------------|--------------------------------------------|
| Birth weight (g) <sup>b</sup>          | All                 | 750 | 18.8 (-19.4, 56.9)                         | 24.2 (-21.2, 69.6)                         | 19.3 (-27.7, 66.3)                         |
|                                        | HIV pos             | 646 | 102.2 (-8.4, 212.8)                        | 102.1 (-28.9, 233.1)                       | 71.3 (-57.5, 200.1)                        |
|                                        | HIV neg             | 104 | 7.7 (-32.9, 48.2)                          | 13.7 (-34.6, 62.0)                         | 11.4 (-39.0, 61.9)                         |
|                                        | $\rho_{\text{int}}$ |     | 0.115                                      | 0.214                                      | 0.395                                      |
| Length (cm) <sup>b</sup>               | All                 | 745 | 0.19 (0.00, 0.39) <sup>d</sup>             | 0.24 (0.02, 0.47) <sup>d</sup>             | 0.23 (0.00, 0.47)                          |
|                                        | HIV pos             | 103 | 0.44 (-0.11, 1.00)                         | 0.53 (-0.13, 1.18)                         | 0.33 (-0.32, 0.98)                         |
|                                        | HIV neg             | 642 | 0.16 (-0.04, 0.36)                         | 0.21 (-0.04, 0.45)                         | 0.22 (-0.03, 0.47)                         |
|                                        | $\rho_{\text{int}}$ |     | 0.347                                      | 0.363                                      | 0.760                                      |
| Head circumference (cm) <sup>b</sup>   | All                 | 745 | 0.11 (-0.02, 0.23)                         | 0.06 (-0.09, 0.21)                         | 0.12 (-0.03, 0.27)                         |
|                                        | HIV pos             | 103 | 0.32 (-0.04, 0.68)                         | 0.22 (-0.20, 0.65)                         | 0.32 (-0.10, 0.74)                         |
|                                        | HIV neg             | 642 | 0.08 (-0.05, 0.21)                         | 0.04 (-0.12, 0.20)                         | 0.09 (-0.07, 0.26)                         |
|                                        | $\rho_{\text{int}}$ |     | 0.210                                      | 0.423                                      | 0.321                                      |
| Gestational age (weeks) <sup>b</sup>   | All                 | 751 | 0.01 (-0.19, 0.22)                         | -0.07 (-0.31, 0.17)                        | 0.00 (-0.25, 0.25)                         |
|                                        | HIV pos             | 104 | 0.07 (-0.52, 0.67)                         | -0.03 (-0.73, 0.67)                        | 0.03 (-0.66, 0.72)                         |
|                                        | HIV neg             | 647 | 0.01 (-0.21, 0.22)                         | -0.07 (-0.33, 0.19)                        | 0.00 (-0.27, 0.27)                         |
|                                        | $\rho_{\text{int}}$ |     | 0.828                                      | 0.911                                      | 0.928                                      |
| Low birth weight <sup>c</sup>          | All                 | 750 | 0.82 (0.61, 1.10)                          | 0.74 (0.50, 1.09)                          | 0.87 (0.58, 1.31)                          |
|                                        | HIV pos             | 646 | 0.73 (0.33, 1.62)                          | 0.67 (0.29, 1.51)                          | 0.87 (0.32, 2.33)                          |
|                                        | HIV neg             | 104 | 0.84 (0.61, 1.16)                          | 0.75 (0.49, 1.16)                          | 0.87 (0.56, 1.37)                          |
|                                        | $\rho_{\text{int}}$ |     | 0.764                                      | 0.793                                      | 0.990                                      |
| Preterm birth <sup>c</sup>             | All                 | 751 | 0.98 (0.76, 1.25)                          | 1.01 (0.75, 1.36)                          | 1.07 (0.79, 1.45)                          |
|                                        | HIV pos             | 104 | 1.21 (0.60, 2.42)                          | 1.11 (0.47, 2.64)                          | 1.60 (0.73, 3.50)                          |
|                                        | HIV neg             | 647 | 0.94 (0.72, 1.22)                          | 0.99 (0.73, 1.35)                          | 0.98 (0.71, 1.36)                          |
|                                        | $\rho_{\text{int}}$ |     | 0.498                                      | 0.806                                      | 0.256                                      |
| Small for gestational age <sup>c</sup> | All                 | 750 | 0.95 (0.77, 1.17)                          | 0.88 (0.67, 1.14)                          | 0.93 (0.71, 1.21)                          |
|                                        | HIV pos             | 646 | 0.63 (0.37, 1.06)                          | 0.46 (0.22, 0.95) <sup>d</sup>             | 0.71 (0.38, 1.32)                          |
|                                        | HIV neg             | 104 | 1.01 (0.80, 1.27)                          | 0.96 (0.73, 1.28)                          | 0.97 (0.73, 1.30)                          |
|                                        | $\rho_{\text{int}}$ |     | 0.103                                      | 0.065                                      | 0.361                                      |
| Large for gestational age <sup>c</sup> | All                 | 750 | 1.09 (0.71, 1.66)                          | 1.24 (0.79, 1.95)                          | 1.07 (0.63, 1.82)                          |
|                                        | HIV pos             | 646 | 2.01 (0.86, 4.68)                          | 2.58 (0.76, 8.71)                          | 1.49 (0.37, 5.97)                          |
|                                        | HIV neg             | 104 | 0.99 (0.62, 1.59)                          | 1.13 (0.70, 1.82)                          | 1.01 (0.58, 1.78)                          |
|                                        | $\rho_{\text{int}}$ |     | 0.149                                      | 0.208                                      | 0.609                                      |

<sup>a</sup> Models adjusted for maternal age, education, marital status, smoking, alcohol use during pregnancy, post-delivery BMI, and HIV status; household income per capita and assets; child sex, parity, delivery method, and season of birth.

<sup>b</sup> Coefficients show the change in mean outcome for each 10-fold increase in maternal peripartum serum DDT/E concentration.

<sup>c</sup> Coefficients show the odd ratio for each 10-fold increase in maternal peripartum serum DDT/E concentration.

<sup>d</sup>  $P < 0.05$ .

**Web Table 18.** Interactions by maternal HIV status for associations between maternal peripartum urinary pyrethroid metabolite concentrations and birth outcomes in VHEMBE study participants based on standard multivariable regression models<sup>a</sup>

|                                        |                  |     | <i>cis</i> -DBCA                 | <i>cis</i> -DCCA     | <i>trans</i> -DCCA    | 3-PBA                |
|----------------------------------------|------------------|-----|----------------------------------|----------------------|-----------------------|----------------------|
|                                        |                  | N   | β/OR (95% CI)                    | β/OR (95% CI)        | β/OR (95% CI)         | β/OR (95% CI)        |
| Birth weight (g) <sup>b</sup>          | All              | 738 | 18.2 (-41.0, 77.4)               | -9.6 (-77.6, 58.4)   | -5.3 (-64.6, 53.9)    | 5.3 (-66.2, 76.8)    |
|                                        | HIV pos          | 97  | 202.1 (45.8, 358.3) <sup>d</sup> | 22.2 (-161.3, 205.6) | -10.6 (-163.9, 142.6) | 36.3 (-134.6, 207.2) |
|                                        | HIV neg          | 641 | -12.1 (-75.8, 51.5)              | -14.6 (-87.7, 58.5)  | -4.4 (-68.7, 59.9)    | -1.2 (-79.8, 77.4)   |
|                                        | p <sub>int</sub> |     | 0.013                            | 0.714                | 0.941                 | 0.695                |
| Length (cm) <sup>b</sup>               | All              | 733 | 0.11 (-0.18, 0.41)               | 0.04 (-0.30, 0.38)   | 0.02 (-0.28, 0.31)    | 0.15 (-0.20, 0.51)   |
|                                        | HIV pos          | 96  | 0.52 (-0.28, 1.32)               | 0.23 (-0.68, 1.15)   | 0.00 (-0.77, 0.77)    | 0.35 (-0.51, 1.20)   |
|                                        | HIV neg          | 637 | 0.05 (-0.27, 0.37)               | 0.01 (-0.35, 0.38)   | 0.02 (-0.30, 0.34)    | 0.11 (-0.28, 0.51)   |
|                                        | p <sub>int</sub> |     | 0.286                            | 0.666                | 0.957                 | 0.627                |
| Head circumference (cm) <sup>b</sup>   | All              | 733 | 0.07 (-0.12, 0.27)               | 0.01 (-0.21, 0.23)   | -0.02 (-0.21, 0.18)   | -0.02 (-0.26, 0.21)  |
|                                        | HIV pos          | 96  | 0.55 (0.03, 1.07) <sup>d</sup>   | 0.03 (-0.57, 0.62)   | -0.05 (-0.55, 0.44)   | 0.10 (-0.45, 0.66)   |
|                                        | HIV neg          | 637 | 0.00 (-0.21, 0.21)               | 0.01 (-0.23, 0.25)   | -0.01 (-0.22, 0.20)   | -0.05 (-0.31, 0.20)  |
|                                        | p <sub>int</sub> |     | 0.053                            | 0.949                | 0.865                 | 0.625                |
| Gestational age (weeks) <sup>b</sup>   | All              | 738 | 0.06 (-0.26, 0.37)               | 0.06 (-0.31, 0.42)   | 0.02 (-0.30, 0.34)    | -0.03 (-0.41, 0.35)  |
|                                        | HIV pos          | 97  | 0.63 (-0.21, 1.46)               | 0.44 (-0.53, 1.42)   | 0.31 (-0.51, 1.12)    | 0.43 (-0.47, 1.34)   |
|                                        | HIV neg          | 641 | -0.04 (-0.38, 0.30)              | -0.01 (-0.39, 0.38)  | -0.03 (-0.37, 0.31)   | -0.13 (-0.55, 0.29)  |
|                                        | p <sub>int</sub> |     | 0.150                            | 0.402                | 0.456                 | 0.270                |
| Low birth weight <sup>c</sup>          | All              | 738 | 0.79 (0.48, 1.30)                | 0.74 (0.47, 1.18)    | 0.83 (0.55, 1.25)     | 0.68 (0.41, 1.15)    |
|                                        | HIV pos          | 97  | 0.31 (0.09, 1.09)                | 0.45 (0.14, 1.44)    | 0.54 (0.19, 1.57)     | 0.43 (0.13, 1.34)    |
|                                        | HIV neg          | 641 | 0.98 (0.59, 1.62)                | 0.83 (0.51, 1.36)    | 0.92 (0.60, 1.41)     | 0.79 (0.45, 1.40)    |
|                                        | p <sub>int</sub> |     | 0.094                            | 0.340                | 0.364                 | 0.341                |
| Preterm birth <sup>c</sup>             | All              | 738 | 0.98 (0.67, 1.44)                | 0.87 (0.59, 1.28)    | 1.01 (0.72, 1.41)     | 1.03 (0.68, 1.55)    |
|                                        | HIV pos          | 97  | 0.56 (0.25, 1.24)                | 0.86 (0.28, 2.59)    | 1.03 (0.40, 2.63)     | 0.74 (0.27, 2.04)    |
|                                        | HIV neg          | 641 | 1.11 (0.73, 1.69)                | 0.87 (0.57, 1.31)    | 1.00 (0.70, 1.44)     | 1.13 (0.73, 1.76)    |
|                                        | p <sub>int</sub> |     | 0.137                            | 0.982                | 0.967                 | 0.456                |
| Small for gestational age <sup>c</sup> | All              | 738 | 1.03 (0.74, 1.44)                | 0.97 (0.68, 1.39)    | 1.02 (0.75, 1.39)     | 1.04 (0.72, 1.52)    |
|                                        | HIV pos          | 97  | 0.81 (0.36, 1.82)                | 1.74 (0.72, 4.20)    | 1.42 (0.67, 3.03)     | 1.41 (0.62, 3.23)    |
|                                        | HIV neg          | 641 | 1.08 (0.75, 1.57)                | 0.87 (0.58, 1.30)    | 0.95 (0.67, 1.35)     | 0.97 (0.64, 1.48)    |
|                                        | p <sub>int</sub> |     | 0.519                            | 0.163                | 0.348                 | 0.427                |
| Large for gestational age <sup>c</sup> | All              | 738 | 0.70 (0.38, 1.28)                | 0.93 (0.48, 1.81)    | 0.96 (0.53, 1.76)     | 0.94 (0.46, 1.95)    |
|                                        | HIV pos          | 97  | 0.51 (0.16, 1.59)                | 0.39 (0.08, 1.97)    | 0.33 (0.08, 1.32)     | 0.41 (0.11, 1.58)    |
|                                        | HIV neg          | 641 | 0.74 (0.37, 1.47)                | 1.07 (0.54, 2.14)    | 1.17 (0.62, 2.19)     | 1.12 (0.50, 2.49)    |
|                                        | p <sub>int</sub> |     | 0.579                            | 0.254                | 0.097                 | 0.200                |



<sup>a</sup> Models adjusted for maternal age, education, marital status, smoking, alcohol use during pregnancy, post-delivery BMI, and HIV status; household income per capita and assets; child sex, parity, delivery method, and season of birth.

<sup>b</sup> Coefficients show the change in mean outcome for each 10-fold increase in maternal peripartum pyrethroid metabolite concentration.

<sup>c</sup> Coefficients show the odd ratio for each 10-fold increase in maternal peripartum pyrethroid metabolite concentration.

**Web Table 19.** Interactions maternal HIV status for associations between maternal peripartum serum DDT/E concentrations and birth outcomes in VHEMBE study participants based on propensity score models<sup>a</sup>

|                                        |                     | N   | $\rho, \rho'$ -DDT<br>$\beta$ /OR (95% CI) | $\rho, \rho'$ -DDE<br>$\beta$ /OR (95% CI) | $\rho, \rho'$ -DDT<br>$\beta$ /OR (95% CI) |
|----------------------------------------|---------------------|-----|--------------------------------------------|--------------------------------------------|--------------------------------------------|
| Birth weight (g) <sup>b</sup>          | All                 | 750 | 15.8 (-24.0, 55.6)                         | 11.6 (-36.8, 60.0)                         | 12.6 (-37.5, 62.6)                         |
|                                        | HIV pos             | 646 | 90.6 (-25.1, 206.3)                        | 78.9 (-59.1, 216.9)                        | 23.1 (-112.7, 159.0)                       |
|                                        | HIV neg             | 104 | 5.0 (-36.9, 46.9)                          | 1.8 (-49.1, 52.7)                          | 6.7 (-46.3, 59.6)                          |
|                                        | $\rho_{\text{int}}$ |     | 0.172                                      | 0.302                                      | 0.823                                      |
| Length (cm) <sup>b</sup>               | All                 | 745 | 0.20 (0.00, 0.39)                          | 0.21 (-0.03, 0.45)                         | 0.22 (-0.03, 0.47)                         |
|                                        | HIV pos             | 103 | 0.35 (-0.22, 0.92)                         | 0.41 (-0.27, 1.10)                         | 0.10 (-0.59, 0.78)                         |
|                                        | HIV neg             | 642 | 0.17 (-0.04, 0.38)                         | 0.18 (-0.08, 0.43)                         | 0.22 (-0.04, 0.48)                         |
|                                        | $\rho_{\text{int}}$ |     | 0.568                                      | 0.525                                      | 0.735                                      |
| Head circumference (cm) <sup>b</sup>   | All                 | 745 | 0.10 (-0.04, 0.23)                         | 0.02 (-0.14, 0.18)                         | 0.09 (-0.08, 0.26)                         |
|                                        | HIV pos             | 103 | 0.28 (-0.10, 0.67)                         | 0.17 (-0.29, 0.63)                         | 0.15 (-0.31, 0.60)                         |
|                                        | HIV neg             | 642 | 0.07 (-0.07, 0.21)                         | -0.01 (-0.18, 0.16)                        | 0.07 (-0.11, 0.24)                         |
|                                        | $\rho_{\text{int}}$ |     | 0.302                                      | 0.477                                      | 0.740                                      |
| Gestational age (weeks) <sup>b</sup>   | All                 | 751 | 0.03 (-0.18, 0.23)                         | -0.08 (-0.33, 0.17)                        | 0.00 (-0.26, 0.26)                         |
|                                        | HIV pos             | 104 | -0.05 (-0.64, 0.55)                        | -0.19 (-0.91, 0.52)                        | -0.14 (-0.84, 0.56)                        |
|                                        | HIV neg             | 647 | 0.04 (-0.18, 0.25)                         | -0.07 (-0.33, 0.19)                        | 0.01 (-0.26, 0.29)                         |
|                                        | $\rho_{\text{int}}$ |     | 0.803                                      | 0.745                                      | 0.690                                      |
| Low birth weight <sup>c</sup>          | All                 | 750 | 0.84 (0.60, 1.20)                          | 0.77 (0.52, 1.13)                          | 0.90 (0.60, 1.34)                          |
|                                        | HIV pos             | 646 | 0.81 (0.36, 1.83)                          | 0.77 (0.31, 1.93)                          | 1.01 (0.42, 2.43)                          |
|                                        | HIV neg             | 104 | 0.86 (0.58, 1.27)                          | 0.78 (0.51, 1.19)                          | 0.90 (0.57, 1.42)                          |
|                                        | $\rho_{\text{int}}$ |     | 0.907                                      | 0.985                                      | 0.816                                      |
| Preterm birth <sup>c</sup>             | All                 | 751 | 0.96 (0.74, 1.24)                          | 1.06 (0.77, 1.44)                          | 1.08 (0.77, 1.52)                          |
|                                        | HIV pos             | 104 | 1.33 (0.70, 2.52)                          | 1.34 (0.62, 2.87)                          | 2.05 (0.94, 4.45)                          |
|                                        | HIV neg             | 647 | 0.90 (0.68, 1.20)                          | 1.01 (0.72, 1.43)                          | 0.96 (0.66, 1.41)                          |
|                                        | $\rho_{\text{int}}$ |     | 0.274                                      | 0.512                                      | 0.082                                      |
| Small for gestational age <sup>c</sup> | All                 | 750 | 0.93 (0.75, 1.14)                          | 0.85 (0.67, 1.08)                          | 0.90 (0.70, 1.16)                          |
|                                        | HIV pos             | 646 | 0.65 (0.36, 1.17)                          | 0.51 (0.25, 1.03)                          | 0.76 (0.39, 1.48)                          |
|                                        | HIV neg             | 104 | 0.98 (0.79, 1.22)                          | 0.91 (0.71, 1.19)                          | 0.94 (0.71, 1.24)                          |
|                                        | $\rho_{\text{int}}$ |     | 0.196                                      | 0.128                                      | 0.556                                      |
| Large for gestational age <sup>c</sup> | All                 | 750 | 1.01 (0.71, 1.45)                          | 1.20 (0.73, 1.96)                          | 0.96 (0.60, 1.52)                          |
|                                        | HIV pos             | 646 | 1.79 (0.65, 4.96)                          | 2.46 (0.64, 9.50)                          | 1.27 (0.38, 4.24)                          |
|                                        | HIV neg             | 104 | 0.93 (0.63, 1.38)                          | 1.08 (0.64, 1.83)                          | 0.92 (0.56, 1.51)                          |
|                                        | $\rho_{\text{int}}$ |     | 0.238                                      | 0.259                                      | 0.624                                      |

<sup>a</sup> Propensity scores and inverse probability of treatment weights were based on conditional probability density functions determined using the Super Learner algorithm.

<sup>b</sup> Coefficients show the change in mean outcome for each 10-fold increase in maternal peripartum serum DDT/E or pyrethroid metabolite concentration.

<sup>c</sup> Coefficients show the odd ratio for each 10-fold increase in maternal peripartum serum DDT/E concentration.

<sup>d</sup>  $P < 0.05$ .

**Web Table 20.** Interactions by maternal HIV status for associations between maternal peripartum urinary pyrethroid metabolite concentrations and birth outcomes in VHEMBE study participants based on propensity score models<sup>a</sup>

|                                        |                  |     | <i>cis</i> -DBCA     | <i>cis</i> -DCCA    | <i>trans</i> -DCCA   | 3-PBA                |
|----------------------------------------|------------------|-----|----------------------|---------------------|----------------------|----------------------|
|                                        |                  | N   | β/OR (95% CI)        | β/OR (95% CI)       | β/OR (95% CI)        | β/OR (95% CI)        |
| Birth weight (g) <sup>b</sup>          | All              | 738 | 24.4 (-38.3, 87.2)   | 4.0 (-67.3, 75.2)   | -5.0 (-67.9, 57.8)   | 19.9 (-54.0, 93.8)   |
|                                        | HIV pos          | 97  | -19.6 (-105.9, 66.6) | -7.0 (-102.8, 88.9) | -27.4 (-111.4, 56.6) | -24.4 (-122.3, 73.4) |
|                                        | HIV neg          | 641 | 70.0 (-20.7, 160.7)  | 17.6 (-86.9, 122.0) | 21.2 (-71.2, 113.7)  | 74.3 (-37.5, 186.1)  |
|                                        | p <sub>int</sub> |     | 0.160                | 0.732               | 0.441                | 0.192                |
| Length (cm) <sup>b</sup>               | All              | 733 | 0.04 (-0.27, 0.36)   | 0.02 (-0.33, 0.38)  | -0.05 (-0.36, 0.26)  | 0.13 (-0.23, 0.50)   |
|                                        | HIV pos          | 96  | -0.09 (-0.52, 0.34)  | -0.15 (-0.62, 0.32) | -0.25 (-0.66, 0.16)  | -0.09 (-0.57, 0.38)  |
|                                        | HIV neg          | 637 | 0.16 (-0.29, 0.60)   | 0.24 (-0.28, 0.75)  | 0.18 (-0.27, 0.63)   | 0.39 (-0.15, 0.94)   |
|                                        | p <sub>int</sub> |     | 0.427                | 0.277               | 0.160                | 0.187                |
| Head circumference (cm) <sup>b</sup>   | All              | 733 | 0.02 (-0.19, 0.23)   | -0.02 (-0.25, 0.22) | -0.07 (-0.28, 0.13)  | -0.03 (-0.27, 0.21)  |
|                                        | HIV pos          | 96  | -0.17 (-0.45, 0.11)  | -0.11 (-0.42, 0.20) | -0.10 (-0.38, 0.17)  | -0.17 (-0.49, 0.14)  |
|                                        | HIV neg          | 637 | 0.19 (-0.10, 0.49)   | 0.10 (-0.24, 0.44)  | -0.04 (-0.34, 0.26)  | 0.12 (-0.24, 0.49)   |
|                                        | p <sub>int</sub> |     | 0.079                | 0.360               | 0.757                | 0.226                |
| Gestational age (weeks) <sup>b</sup>   | All              | 738 | -0.04 (-0.36, 0.28)  | 0.13 (-0.24, 0.49)  | 0.06 (-0.26, 0.38)   | 0.00 (-0.38, 0.37)   |
|                                        | HIV pos          | 97  | -0.10 (-0.54, 0.34)  | 0.14 (-0.35, 0.63)  | 0.04 (-0.39, 0.47)   | -0.06 (-0.56, 0.44)  |
|                                        | HIV neg          | 641 | 0.01 (-0.45, 0.48)   | 0.11 (-0.42, 0.64)  | 0.08 (-0.39, 0.56)   | 0.07 (-0.50, 0.64)   |
|                                        | p <sub>int</sub> |     | 0.735                | 0.933               | 0.888                | 0.726                |
| Low birth weight <sup>c</sup>          | All              | 738 | 0.75 (0.45, 1.26)    | 0.63 (0.30, 1.30)   | 0.80 (0.43, 1.48)    | 0.62 (0.32, 1.22)    |
|                                        | HIV pos          | 97  | 0.81 (0.36, 1.80)    | 0.84 (0.28, 2.53)   | 1.12 (0.43, 2.93)    | 1.05 (0.38, 2.88)    |
|                                        | HIV neg          | 641 | 0.72 (0.37, 1.41)    | 0.51 (0.20, 1.33)   | 0.63 (0.27, 1.43)    | 0.42 (0.17, 1.06)    |
|                                        | p <sub>int</sub> |     | 0.828                | 0.503               | 0.373                | 0.198                |
| Preterm birth <sup>c</sup>             | All              | 738 | 1.07 (0.69, 1.66)    | 0.82 (0.50, 1.36)   | 1.01 (0.65, 1.58)    | 1.03 (0.62, 1.73)    |
|                                        | HIV pos          | 97  | 1.27 (0.69, 2.34)    | 0.99 (0.51, 1.94)   | 1.25 (0.69, 2.26)    | 1.28 (0.64, 2.54)    |
|                                        | HIV neg          | 641 | 0.88 (0.47, 1.68)    | 0.66 (0.31, 1.39)   | 0.78 (0.40, 1.52)    | 0.79 (0.36, 1.72)    |
|                                        | p <sub>int</sub> |     | 0.419                | 0.420               | 0.302                | 0.364                |
| Small for gestational age <sup>c</sup> | All              | 738 | 1.01 (0.74, 1.38)    | 1.02 (0.70, 1.49)   | 1.09 (0.78, 1.51)    | 1.09 (0.74, 1.61)    |
|                                        | HIV pos          | 97  | 1.30 (0.86, 1.96)    | 1.25 (0.78, 2.02)   | 1.29 (0.85, 1.95)    | 1.33 (0.81, 2.18)    |
|                                        | HIV neg          | 641 | 0.67 (0.40, 1.11)    | 0.71 (0.38, 1.35)   | 0.82 (0.47, 1.41)    | 0.72 (0.37, 1.41)    |
|                                        | p <sub>int</sub> |     | 0.045                | 0.165               | 0.195                | 0.147                |
| Large for gestational age <sup>c</sup> | All              | 738 | 0.83 (0.43, 1.60)    | 0.86 (0.43, 1.72)   | 0.90 (0.50, 1.64)    | 0.97 (0.49, 1.94)    |
|                                        | HIV pos          | 97  | 0.82 (0.34, 2.00)    | 1.18 (0.47, 2.97)   | 1.15 (0.52, 2.56)    | 1.16 (0.46, 2.90)    |
|                                        | HIV neg          | 641 | 0.84 (0.32, 2.21)    | 0.56 (0.19, 1.67)   | 0.65 (0.26, 1.66)    | 0.76 (0.26, 2.23)    |
|                                        | p <sub>int</sub> |     | 0.969                | 0.310               | 0.364                | 0.561                |

<sup>a</sup> Propensity scores and inverse probability of treatment weights were based on conditional probability density functions determined using the Super Learner algorithm.

<sup>b</sup> Coefficients show the change in mean outcome for each 10-fold increase in maternal peripartum pyrethroid metabolite concentration.

<sup>c</sup> Coefficients show the odd ratio for each 10-fold increase in maternal peripartum pyrethroid metabolite concentration.

<sup>d</sup>  $P < 0.05$ .
